# Supplementary material for: Characterisation of the unknown chemical composition of a commercial biodegradable agricultural plastic mulch film using complementary spectrometric and spectroscopic techniques
Source: Analyst. 2025 Jul 3;150(15):3319–32. doi: 10.1039/d5an00423c (PMC12235505; doi:10.1039/d5an00423c)
Supplement: AN-150-D5AN00423C-s001 [file AN-150-D5AN00423C-s001.xlsx]

## Sheet: Contents
	Title:	Characterisation of the unknown chemical composition of a commercial biodegradable agricultural plastic mulch film using complementary spectrometric and spectroscopic techniques
	Authors:	Charlie Monkleya, Michaela K. Reaya, Richard P. Eversheda, Charlotte E.M. Lloyda,b,*
	Affiliations:	aOrganic Geochemistry Unit, School of Chemistry, University of Bristol, Cantock’s Close, Bristol, BS8 1TS, UK.
		bSchool of Geographical Sciences, University of Bristol, University Road, Bristol, BS8 1SS, UK.
		Author for correspondence: Charlotte E.M. Lloyd email: charlotte.lloyd@bristol.ac.uk Tel: +44 (0)117 455 0991
	Contents
	Spreadsheet 1.	Predicted oligomer structure database
	Spreadsheet 2.	DI-Orbitrap-MS sequence data extraction overview and QA
	Spreadsheet 3.	DI-Orbitrap-MS assigned structures
	Spreadsheet 4.	DI-Orbitrap-MS PBA extracted ion sequences
	Spreadsheet 5.	DI-Orbitrap-MS PBT extracted ion sequences
	Spreadsheet 6.	DI-Orbitrap-MS PBSe extracted ion sequences
	Spreadsheet 7.	DI-Orbitrap-MS PLA extracted ion sequences
	Spreadsheet 8.	HPLC-Orbitrap-MS QA STD
	Spreadsheet 9.	HPLC-Orbitrap-MS assigned compounds

## Sheet: 1. Predicted Structure Database
Strcuture	Type	Elemental Formula	Mass
[LA]	Linear	C3H6O3	90.0317		AA	C6H8O		Element	Isotope	Mass	Abund.
[LA]-Me	Linear	C4H8O3	104.047		TA	C8H4O3		Carbon	C(12)	12	98.9
LA]2	Cyclic	C6H8O4	144.042		SeA	C10H16O3		Carbon	C(13)	13.0034	1.1
[LA]2	Linear	C6H10O5	162.053		LA	C3H4O2		Hydrogen	H(1)	1.00782	99.99
[LA]2-Me	Linear	C7H12O5	176.068		BD	C4H8O		Hydrogen	H(2)	2.0141	0.015
[AA-BD]	Cyclic	C10H16O4	200.105		PMP	C21H42O5		Oxygen	O(16)	15.9949	99.76
[LA]3	Cyclic	C9H12O6	216.063		PMS	C23H46O5		Oxygen	O(17)	16.9991	0.038
[AA-BD]	Linear	C10H18O5	218.115		PMP = Pentaerythritol monopalmitate			Oxygen	O(18)	17.9992	0.2
[TA-BD]	Cyclic	C12H12O4	220.074		PMS = Pentaerythritol monostearate			Nitrogen	N(14)	14.0031	99.63
[LA]3	Linear	C9H14O7	234.074					Nitrogen	N(15)	15.0001	0.37
[TA-BD]	Linear	C12H14O5	238.084					Sodium	Na(23)	22.9898	100
[LA]3-Me	Linear	C10H16O7	248.09					Potassium	K(39)	38.9637	93.2
[SeA-BD]	Cyclic	C14H24O4	256.167					Potassium	K(40)	39.964	0.012
[SeA-BD]	Linear	C14H26O5	274.178
[LA]4	Cyclic	C12H16O8	288.085					Potassium	K(41)	40.9618	6.73
BD-[AA-BD]	Linear	C14H26O6	290.173
[LA]4	Linear	C12H18O9	306.095
BD-[TA-BD]	Linear	C16H22O6	310.142
[LA]4-Me	Linear	C13H20O9	320.111
[AA-BD]-AA	Linear	C16H26O8	346.163
BD-[SeA-BD]	Linear	C18H34O6	346.236
[LA]5	Cyclic	C15H20O10	360.106
[AA-BD]-TA	Linear	C18H22O8	366.131
[TA-BD]-AA	Linear	C18H22O8	366.131
[PMP]		C21H42O5	374.303
[LA]5	Linear	C15H22O11	378.116
[TA-BD]-TA	Linear	C20H18O8	386.1
[LA]5-Me	Linear	C16H24O11	392.132
[AA-BD]2	Cyclic	C20H32O8	400.21
[SeA-BD]-AA	Linear	C20H34O8	402.225
[PMS]		C23H46O5	402.335
[AA-BD]2	Linear	C20H34O9	418.22
[AA-BD]-[TA-BD]	Cyclic	C22H28O8	420.178
[SeA-BD]-TA	Linear	C22H30O8	422.194
[LA]6	Cyclic	C18H24O12	432.127
[AA-BD]-[TA-BD]	Linear	C22H30O9	438.189
[TA-BD]-[AA-BD]	Linear	C22H30O9	438.189
[TA-BD]2	Cyclic	C24H24O8	440.147
[PMP]-[LA]		C24H46O7	446.324
[LA]6	Linear	C18H26O13	450.137
[AA-BD]-[SeA-BD]	Cyclic	C24H40O8	456.272
[TA-BD]2	Linear	C24H26O9	458.158
[SeA-BD]-SeA	Linear	C24H42O8	458.288
[LA]6-Me	Linear	C19H28O13	464.153
[SeA-BD]-[AA-BD]	Linear	C24H42O9	474.283
[PMS]-[LA]		C26H50O7	474.356
[TA-BD]-[SeA-BD]	Cyclic	C26H36O8	476.241
BD-[AA-BD]2	Linear	C24H42O10	490.278
[SeA-BD]-[TA-BD]	Linear	C26H38O9	494.252
[SeA-BD]2	Cyclic	C28H48O8	512.335
BD-[TA-BD]2	Linear	C28H34O10	530.215
[SeA-BD]2	Linear	C28H50O9	530.345
[LA]7-Me	Linear	C22H32O15	536.174
[AA-BD]2-AA	Linear	C26H42O12	546.268
[AA-BD]2-TA	Linear	C28H38O12	566.236
[TA-BD]2-AA	Linear	C30H34O12	586.205
[AA-BD]3	Cyclic	C30H48O12	600.315
BD-[SeA-BD]2	Linear	C32H58O10	602.403
[TA-BD]2-TA	Linear	C32H30O12	606.174
[AA-BD]3	Linear	C30H50O13	618.325
[AA-BD]2-[TA-BD]	Cyclic	C32H44O12	620.283
[AA-BD]2-[TA-BD]	Linear	C32H46O13	638.294
[AA-BD]-[TA-BD]2	Cyclic	C34H40O12	640.252
[AA-BD]2-[SeA-BD]	Cyclic	C34H56O12	656.377
[TA-BD]2-[AA-BD]	Linear	C34H42O13	658.263
[SeA-BD]2-AA	Linear	C34H58O12	658.393
[TA-BD]3	Cyclic	C36H36O12	660.221
[TA-BD]3	Linear	C36H38O13	678.231
[SeA-BD]2-TA	Linear	C36H54O12	678.362
BD-[AA-BD]3	Linear	C34H58O14	690.383
[TA-BD]2-[SeA-BD]	Cyclic	C38H48O12	696.315
[AA-BD]-[SeA-BD]2	Cyclic	C38H64O12	712.44
[SeA-BD]2-SeA	Linear	C38H66O12	714.455
[SeA-BD]2-[AA-BD]	Linear	C38H66O13	730.45
[TA-BD]-[SeA-BD]2	Cyclic	C40H60O12	732.408
[AA-BD]3-AA	Linear	C36H58O16	746.372
BD-[TA-BD]3	Linear	C40H46O14	750.289
[SeA-BD]2-[TA-BD]	Linear	C40H62O13	750.419
[AA-BD]3-TA	Linear	C38H54O16	766.341
[SeA-BD]3	Cyclic	C42H72O12	768.502
[SeA-BD]3	Linear	C42H74O13	786.513
[AA-BD]4	Cyclic	C40H64O16	800.419
[TA-BD]3-AA	Linear	C42H46O16	806.279
[AA-BD]4	Linear	C40H66O17	818.43
[AA-BD]3-[TA-BD]	Cyclic	C42H60O16	820.388
[TA-BD]3-TA	Linear	C44H42O16	826.247
[AA-BD]2-[TA-BD]2	Cyclic	C44H56O16	840.357
[AA-BD]-[TA-BD]3	Cyclic	C46H52O16	860.326
[TA-BD]4	Cyclic	C48H48O16	880.294
[TA-BD]4	Linear	C48H50O17	896.289
[AA-BD]5	Cyclic	C50H80O20	1000.52

## Sheet: 2. DI-Orbitrap-MS Overview
PBA sequences:
Repeat unit mass	200.105
Mass tolerance	± 0.00100
Min sequence length	4
δ	Detected mass - expected mass (elemental composition)
QA	Detected in all repeats
	If detected in BLANK (m/z ± 0.001) at average BLANK intensity (n = 3) at >10%, normalised to the BBP,
	of average normalised intensity in extracts (n = 3), ion removed from suspect list
Number of extracted sequences	38
Number of assigned sequences	35
Number of extracted ions	182
Number of assigned ions	165
Number of assigned compounds (not incl. isotopologues)	41
PBT sequences:
Repeat unit mass	220.074
Mass tolerance	± 0.00100
Min sequence length	4
δ	Detected mass - expected mass
QA	Detected in all repeats
	If detected in BLANK (m/z ± 0.001) at average BLANK intensity (n = 3) at >10%, normalised to the BBP,
	of average normalised intensity in extracts (n = 3), ion removed from suspect list
Number of extracted sequences	35
Number of assigned sequences	34
Number of extracted ions	140
Number of assigned ions	136
Number of assigned compounds	37
PBSe sequences:
Repeat unit mass	256.167
Mass tolerance	± 0.00100
Min sequence length	4
δ	Detected mass - expected mass
QA	Detected in all repeats
	If detected in BLANK (m/z ± 0.001) at average BLANK intensity (n = 3) at >10%, normalised to the BBP,
	of average normalised intensity in extracts (n = 3), ion removed from suspect list
Number of extracted sequences	14
Number of assigned sequences	14
Number of extracted ions	57
Number of assigned ions	57
Number of assigned compounds	17
PLA sequences:
Repeat unit mass	72.0211
Mass tolerance	± 0.00100
Min sequence length	4
δ	Detected mass - expected mass
QA	Detected in all repeats
	If detected in BLANK (m/z ± 0.001) at average BLANK intensity (n = 3) at >10%, normalised to the BBP,
	of average normalised intensity in extracts (n = 3), ion removed from suspect list
Number of extracted sequences	19
Number of assigned sequences	9
Number of extracted ions	165
Number of assigned ions	107
Number of assigned compounds	38

## Sheet: 3. DI-Orbitrap-MS Assigned
	Assigned compound List
	Structure	Type	Molecular Formula
	[AA-BD]	Cyclic	C10H16O4
	[AA-BD]2	Cyclic	C20H32O8
	[AA-BD]3	Cyclic	C30H48O12
	[AA-BD]4	Cyclic	C40H64O16
	[AA-BD]5	Cyclic	C50H80O20
	[AA-BD]6	Cyclic	C60H96O24
	[TA-BD]-[AA-BD]	Cyclic	C22H28O8
	[TA-BD]-[AA-BD]2	Cyclic	C32H44O12
	[TA-BD]-[AA-BD]3	Cyclic	C42H60O16
	[TA-BD]-[AA-BD]4	Cyclic	C52H76O20
	[TA-BD]-[AA-BD]5	Cyclic	C62H92O24
	[TA-BD]-[AA-BD]6	Cyclic	C72H108O28
	[TA-BD]2	Cyclic	C24H24O8
	[TA-BD]2-[AA-BD]	Cyclic	C34H40O12
	[TA-BD]2-[AA-BD]2	Cyclic	C44H56O16
	[TA-BD]2-[AA-BD]3	Cyclic	C54H72O20
	[TA-BD]2-[AA-BD]4	Cyclic	C64H88O24
	[TA-BD]2-[AA-BD]5	Cyclic	C74H104O28
	Me-[LA]7	Linear	C22H32O15
	Me-[LA]7-[AA-BD]	Linear	C32H48O19
	Me-[LA]7-[AA-BD]2	Linear	C42H64O23
	Me-[LA]7-[AA-BD]4	Linear	C62H96O31
	[TA-BD]3	Cyclic	C36H36O12
	[TA-BD]3-[AA-BD]	Cyclic	C46H52O16
	[TA-BD]3-[AA-BD]2	Cyclic	C56H68O20
	[TA-BD]3-[AA-BD]3	Cyclic	C66H84O24
	[TA-BD]3-[AA-BD]4	Cyclic	C76H100O28
	[TA-BD]3-[AA-BD]5	Cyclic	C86H116O32
	BD-[AA-BD]2	Linear	C24H42O10
	BD-[AA-BD]3	Linear	C34H58O14
	BD-[AA-BD]4	Linear	C44H74O18
	BD-[TA-BD]	Linear	C16H22O6
	BD-[TA-BD]-[AA-BD]	Linear	C26H38O10
	BD-[TA-BD]-[AA-BD]3	Linear	C46H70O18
	BD-[TA-BD]-[AA-BD]4	Linear	C56H86O22
	BD-[TA-BD]2	Linear	C28H34O10
	BD-[TA-BD]2-[AA-BD]	Linear	C38H50O14
	BD-[TA-BD]2-[AA-BD]2	Linear	C48H66O18
	BD-[TA-BD]2-[AA-BD]4	Linear	C68H98O26
	[TA-BD]-[AA-BD]2	Linear	C32H46O13
	[TA-BD]-[AA-BD]3	Linear	C42H62O17
	[TA-BD]-[AA-BD]4	Linear	C52H78O21
	[SeA-BD]2	Cyclic	C28H48O8
	[SeA-BD]2-[TA-BD]	Cyclic	C40H60O12
	[SeA-BD]2-[TA-BD]2	Cyclic	C52H72O16
	[SeA-BD]2-[TA-BD]3	Cyclic	C64H84O20
	[SeA-BD]	Cyclic	C14H24O4
	[SeA-BD]-[TA-BD]	Cyclic	C26H36O8
	[SeA-BD]-[TA-BD]2	Cyclic	C38H48O12
	[SeA-BD]-[TA-BD]3	Cyclic	C50H60O16
	[SeA-BD]3	Cyclic	C42H72O12
	[SeA-BD]3-[TA-BD]	Cyclic	C54H84O16
	[SeA-BD]3-[TA-BD]2	Cyclic	C66H96O20
	[SeA-BD]3-[TA-BD]3	Cyclic	C78H108O24
	BD-[AA-BD]2-[TA-BD]3	Linear	C60H78O22
	BD-[AA-BD]3-[TA-BD]3	Linear	C70H94O26
	[SeA-BD]4	Cyclic	C56H96O16
	[TA-BD]-[SeA-BD]4	Cyclic	C68H108O20
	[TA-BD]2-[SeA-BD]4	Cyclic	C80H120O24
	[LA]2-Me	Linear	C7H12O5
	[LA]3-Me	Linear	C10H16O7
	[LA]4-Me	Linear	C13H20O9
	[LA]5-Me	Linear	C16H24O11
	[LA]6-Me	Linear	C19H28O13
	[LA]7-Me	Linear	C22H32O15
	[LA]8-Me	Linear	C25H36O17
	[LA]9-Me	Linear	C28H40O19
	[LA]10-Me	Linear	C31H44O21
	[LA]11-Me	Linear	C34H48O23
	[LA]12-Me	Linear	C37H52O25
	[LA]13-Me	Linear	C40H56O27
	[LA]14-Me	Linear	C43H60O29
	[LA]15-Me	Linear	C46H64O31
	[LA]16-Me	Linear	C49H68O33
	[LA]17-Me	Linear	C52H72O35
	[LA]18-Me	Linear	C55H76O37
	[LA]19-Me	Linear	C58H80O39
	[LA]20-Me	Linear	C61H84O41
	[LA]6	Cyclic	C18H24O12
	[LA]7	Cyclic	C21H28O14
	[LA]8	Cyclic	C24H32O16
	[LA]9	Cyclic	C27H36O18
	[LA]10	Cyclic	C30H40O20
	[LA]11	Cyclic	C33H44O22
	[LA]12	Cyclic	C36H48O24
	PMS		C23H46O5
	PMS-[LA]		C26H50O7
	PMS-[LA]2		C29H54O9
	PMS-[LA]3		C32H58O11
	PMS-[LA]4		C35H62O13
	PMS-[LA]5		C38H66O15
	PMS-[LA]6		C41H70O17
	PMP		C21H42O5
	PMP-[LA]		C24H46O7
	PMP-[LA]2		C27H50O9
	PMP-[LA]3		C30H54O11
	PMP-[LA]4		C33H58O13
	Total		97

## Sheet: 4. DI-Orbitrap-MS PBA
Sequence	Structure	Type	Isotope	Molecular formula	Adduct	Elemental Composition	Average (n=3) ± 1SD								BLANK Average (n=3) ± 1SD
							Average m/z	±SD	Average δ / Da	±SD	Average Intensity	±SD	Average Normalised Intensity (IS)	±SD	Average Normalised Intensity (IS)	±SD	Normalised Contribution to Extract (IS) / %
1	[AA-BD]	Cyclic		C10H16O4	[M+Na]+	C10H16O4Na	223.094	2.19092e-05	-8.33333e-05	2.08167e-05	125297	11615.6	0.0138496	0.00124345	0.00129665	0.000314585	9.36237
	[AA-BD]2	Cyclic		C20H32O8	[M+Na]+	C20H32O8Na	423.199	7.50355e-06	-4e-05	1e-05	36975196	4.09998e+06	4.07906	0.308439	0.000242272	0.000266714	0.00593942
	[AA-BD]3	Cyclic		C30H48O12	[M+Na]+	C30H48O12Na	623.304	1.31516e-05	-5.66667e-05	1.52753e-05	6.37447e+06	741493	0.702596	0.0459155
	[AA-BD]4	Cyclic		C40H64O16	[M+Na]+	C40H64O16Na	823.409	1.99806e-05	0.00012	1.73205e-05	1.42259e+06	167975	0.156855	0.0118231
	[AA-BD]5	Cyclic		C50H80O20	[M+Na]+	C50H80O20Na	1023.51	0.000136566	-0.000313333	0.000136504	226479	20712.6	0.0250706	0.00279697
	[AA-BD]6	Cyclic		C60H96O24	[M+Na]+	C60H96O24Na	1223.62	0.000377744	3.33333e-06	0.000377403	43530.1	6611.82	0.00488679	0.00134547
1a	[AA-BD]2	Cyclic	13C	C1913CH32O8	[M+Na]+	C1913CH32O8Na	424.202	6.0025e-06	-3.33333e-06	5.7735e-06	8.13047e+06	851929	0.897681	0.0747001
	[AA-BD]3	Cyclic	13C	C2913CH48O12	[M+Na]+	C2913CH48O12Na	624.307	2.0635e-05	-5.66667e-05	2.08167e-05	1.94646e+06	228367	0.214557	0.0147062
	[AA-BD]4	Cyclic	13C	C3913CH64O16	[M+Na]+	C3913CH64O16Na	824.412	6.80172e-06	0.000126667	5.7735e-06	579983	70442.8	0.0639194	0.00454385
	[AA-BD]5	Cyclic	13C	C4913CH80O20	[M+Na]+	C4913CH80O20Na	1024.52	9.84598e-05	-0.00023	9.84886e-05	117398	13317.4	0.0129438	0.000876503
	[AA-BD]6	Cyclic	13C	C5913CH96O24	[M+Na]+	C5913CH96O24Na	1224.62	7.93872e-05	0.000403333	8.0829e-05	20861.2	1345.37	0.00234456	0.000524552
2	[AA-BD]2	Cyclic		C20H32O8	[M+NH4]+	C20H36O8N	418.244	1.00321e-05	3.33333e-05	1.1547e-05	1.2313e+07	984728	1.36738	0.196978	2.83558e-05	1.45636e-05	0.00207373
	[AA-BD]3	Cyclic		C30H48O12	[M+NH4]+	C30H52O12N	618.348	2.32616e-05	-7.33333e-05	2.51661e-05	5.9222e+06	424728	0.658733	0.103251
	[AA-BD]4	Cyclic		C40H64O16	[M+NH4]+	C40H68O16N	818.453	7.94855e-05	3e-05	7.81025e-05	1.31847e+06	119703	0.146267	0.020394
	[AA-BD]5	Cyclic		C50H80O20	[M+NH4]+	C50H84O20N	1018.56	0.000126653	-0.00049	0.000130767	232347	17807.5	0.0258065	0.00370784
	[AA-BD]6	Cyclic		C60H96O24	[M+NH4]+	C60H100O24N	1218.66	6.67757e-05	-0.000313333	7.0946e-05	29367	9597.62	0.00328208	0.00128848
2a	[AA-BD]2	Cyclic	13C	C1913CH32O8	[M+NH4]+	C1913CH36O8N	419.247	1.04987e-05	9e-05	1e-05	2.61704e+06	184902	0.290527	0.0389397
	[AA-BD]3	Cyclic	13C	C2913CH48O12	[M+NH4]+	C2913CH52O12N	619.352	2.86643e-05	-4.33333e-05	3.05505e-05	1.8412e+06	138080	0.204773	0.0322085
	[AA-BD]4	Cyclic	13C	C3913CH64O16	[M+NH4]+	C3913CH68O16N	819.457	2.81726e-05	4.66667e-05	3.05505e-05	545099	33038.9	0.0608501	0.0112666
	[AA-BD]5	Cyclic	13C	C4913CH80O20	[M+NH4]+	C4913CH84O20N	1019.56	9.09634e-05	-0.000376667	9.29157e-05	138062	20216.3	0.0154979	0.00420406
	[AA-BD]6	Cyclic	13C	C5913CH96O24	[M+NH4]+	C5913CH100O24N	1219.67	0.000535093	0.000306667	0.000534072	23534.3	10728.4	0.00265154	0.00143874	1.04839e-05	1.81586e-05	0.395389
2b	[AA-BD]2	Cyclic	18O	C20H32O718O	[M+NH4]+	C20H36O718ON	420.251	3.63369e-05	0.00278333	3.78594e-05	157950	20262.7	0.0173891	0.0011696
			13C2	C1813C2H32O8		C1813C2H36O8N	420.251	3.63369e-05	0.00032	3.4641e-05	157950	20262.7	0.0173891	0.0011696
	[AA-BD]3	Cyclic	18O	C30H48O1118O	[M+NH4]+	C30H52O1118ON	620.354	2.57144e-05	0.00177333	2.3094e-05	290823	15181	0.0326143	0.00702615
			13C2	C2813C2H48O12		C2813C2H52O12N	620.354	2.57144e-05	-0.00069	2.64575e-05	290823	15181	0.0326143	0.00702615
	[AA-BD]4	Cyclic	18O	C40H64O1518O	[M+NH4]+	C40H68O1518ON	820.46	3.57757e-05	0.00203333	4.04145e-05	129539	5879.65	0.0145115	0.00299012
			13C2	C3813C2H64O16		C3813C2H68O16N	820.46	3.57757e-05	-0.000433333	3.51188e-05	129539	5879.65	0.0145115	0.00299012
	[AA-BD]5	Cyclic	18O	C50H80O1918O	[M+NH4]+	C50H84O1918ON	1020.56	0.000482421	0.00227333	0.000482735	24391.3	3887.48	0.00270607	0.000506985
			13C2	C4813C2H80O20		C4813C2H84O20N	1020.56	0.000482421	-0.000196667	0.000482735	24391.3	3887.48	0.00270607	0.000506985
3	[TA-BD]-[AA-BD]	Cyclic		C22H28O8	[M+NH4]+	C22H32O8N	438.212	1.63638e-05	-0.000133333	1.52753e-05	5.68857e+06	369586	0.632099	0.0896131	0.0295347	0.0511556	4.67248
	[TA-BD]-[AA-BD]2	Cyclic		C32H44O12	[M+NH4]+	C32H48O12N	638.317	2.64593e-05	-9e-05	2.64575e-05	7.39362e+06	613673	0.820417	0.112107
	[TA-BD]-[AA-BD]3	Cyclic		C42H60O16	[M+NH4]+	C42H64O16N	838.422	3.93566e-05	-0.000456667	3.78594e-05	3.25338e+06	245877	0.362105	0.0598471
	[TA-BD]-[AA-BD]4	Cyclic		C52H76O20	[M+NH4]+	C52H80O20N	1038.53	8.1431e-05	-0.00038	8.18535e-05	787550	30846.3	0.0879309	0.0157087
	[TA-BD]-[AA-BD]5	Cyclic		C62H92O24	[M+NH4]+	C62H96O24N	1238.63	6.59394e-05	-9.66667e-05	6.65833e-05	212146	11418.3	0.0236802	0.00430162
	[TA-BD]-[AA-BD]6	Cyclic		C72H108O28	[M+NH4]+	C72H112O28N	1438.74	0.000456602	0.00108	0.000457384	49270.2	7970.9	0.00558765	0.00182631
3a	[TA-BD]-[AA-BD]	Cyclic	13C	C2113CH28O8	[M+NH4]+	C2113CH32O8N	439.215	2.29798e-05	-0.00011	2.64575e-05	1.30776e+06	62047.6	0.145579	0.0223129	0.00692716	0.0119982	4.75836
	[TA-BD]-[AA-BD]2	Cyclic	13C	C3113CH44O12	[M+NH4]+	C3113CH48O12N	639.32	1.92408e-05	-9.66667e-05	2.08167e-05	2.50652e+06	243002	0.278372	0.0434977
	[TA-BD]-[AA-BD]3	Cyclic	13C	C4113CH60O16	[M+NH4]+	C4113CH64O16N	839.425	6.43659e-05	-0.00047	6.08276e-05	1.4571e+06	58738.3	0.162622	0.0285423
	[TA-BD]-[AA-BD]4	Cyclic	13C	C5113CH76O20	[M+NH4]+	C5113CH80O20N	1039.53	4.70354e-05	-0.00038	4.58258e-05	462965	45263.9	0.0516286	0.0100992
	[TA-BD]-[AA-BD]5	Cyclic	13C	C6113CH92O24	[M+NH4]+	C6113CH96O24N	1239.63	0.000159352	-8.66667e-05	0.000161658	158551	19279.5	0.0179115	0.0051389
3b	[TA-BD]-[AA-BD]	Cyclic	18O	C22H28O718O	[M+NH4]+	C22H32O718ON	440.219	3.29308e-05	0.00232667	3.51188e-05	103130	7275.06	0.0114378	0.00139026	0.000436428	0.000755916	3.81566
			13C2	C2013C2H28O8		C2013C2H32O8N	440.219	3.29308e-05	-0.000136667	3.05505e-05	103130	7275.06	0.0114378	0.00139026	0.000436446	0.000755946	3.81581
	[TA-BD]-[AA-BD]2	Cyclic	18O	C32H44O1118O	[M+NH4]+	C32H48O1118ON	640.323	0.000101032	0.00182	9.84886e-05	428480	52193.7	0.0474543	0.00688722
			13C2	C3013C2H44O12		C3013C2H48O12N	640.323	0.000101032	-0.000646667	0.000104083	428480	52193.7	0.0474543	0.00688722
	[TA-BD]-[AA-BD]3	Cyclic	18O	C42H60O1518O	[M+NH4]+	C42H64O1518ON	840.428	8.43052e-05	0.00143667	8.32666e-05	342214	14523.3	0.03812	0.00602618
			13C2	C4013C2H60O16		C4013C2H64O16N	840.428	8.43052e-05	-0.00102667	8.5049e-05	342214	14523.3	0.03812	0.00602618
	[TA-BD]-[AA-BD]4	Cyclic	18O	C52H76O1918O	[M+NH4]+	C52H80O1918ON	1040.53	5.45619e-05	0.00160667	5.7735e-05	154071	19615.7	0.0169731	0.00122206
			13C2	C5013C2H76O20		C5013C2H80O20N	1040.53	5.45619e-05	-0.00086	5.19615e-05	154071	19615.7	0.0169731	0.00122206
	[TA-BD]-[AA-BD]5	Cyclic	18O	C62H92O2318O	[M+NH4]+	C62H96O2318ON	1240.64	0.00046213	0.00184333	0.000463069	54685	8503.53	0.00601389	0.000516568
			13C2	C6013C2H92O24		C6013C2H96O24N	1240.64	0.00046213	-0.000623333	0.000459384	54685	8503.53	0.00601389	0.000516568
4	[TA-BD]-[AA-BD]	Cyclic		C22H28O8	[M+Na]+	C22H28O8Na	443.168	1.18732e-05	-0.00012	1e-05	3.65719e+06	470389	0.402748	0.0268497	0.019223	0.0332952	4.77296
	[TA-BD]-[AA-BD]2	Cyclic		C32H44O12	[M+Na]+	C32H44O12Na	643.272	1.09083e-05	-6.33333e-05	1.1547e-05	5.1735e+06	746296	0.568782	0.0332836
	[TA-BD]-[AA-BD]3	Cyclic		C42H60O16	[M+Na]+	C42H60O16Na	843.377	3.31579e-05	-0.000446667	3.51188e-05	2.75696e+06	425489	0.302735	0.0154322
	[TA-BD]-[AA-BD]4	Cyclic		C52H76O20	[M+Na]+	C52H76O20Na	1043.48	8.33607e-05	-0.000316667	8.32666e-05	682662	82660.4	0.0752537	0.00567443
	[TA-BD]-[AA-BD]5	Cyclic		C62H92O24	[M+Na]+	C62H92O24Na	1243.59	0.000181017	0.000106667	0.000177858	203273	35386.7	0.0223525	0.0025476
	[TA-BD]-[AA-BD]6	Cyclic		C72H108O28	[M+Na]+	C72H108O28Na	1443.69	0.000358233	0.000856667	0.000354448	39230	8382.15	0.00429564	0.000649901
4a	[TA-BD]-[AA-BD]	Cyclic	13C	C2113CH28O8	[M+Na]+	C2113CH28O8Na	444.171	1.53448e-05	-8.33333e-05	1.52753e-05	792785	129915	0.0870084	0.00531154	0.00404958	0.00701407	4.65424
	[TA-BD]-[AA-BD]2	Cyclic	13C	C3113CH44O12	[M+Na]+	C3113CH44O12Na	644.276	1.31348e-05	-5.33333e-05	1.1547e-05	1729901	242318	0.190394	0.014169
	[TA-BD]-[AA-BD]3	Cyclic	13C	C4113CH60O16	[M+Na]+	C4113CH60O16Na	844.38	3.34112e-05	-0.000433333	3.21455e-05	1.24036e+06	193357	0.136268	0.00904254
	[TA-BD]-[AA-BD]4	Cyclic	13C	C5113CH76O20	[M+Na]+	C5113CH76O20Na	1044.49	6.26605e-05	-0.0002	6.08276e-05	381361	55862.8	0.0419412	0.00295262
	[TA-BD]-[AA-BD]5	Cyclic	13C	C6113CH92O24	[M+Na]+	C6113CH92O24Na	1244.59	6.07536e-05	0.000196667	5.7735e-05	128721	10548	0.0142451	0.00139807
4b	[TA-BD]-[AA-BD]	Cyclic	18O	C22H28O718O	[M+Na]+	C22H28O718ONa	445.174	0.000169759	0.00226333	0.000171561	56287.6	16279.8	0.00607621	0.00072282	0.000284426	0.000492641	4.68099
			13C2	C2013C2H28O8		C2013C2H28O8Na	445.174	0.000169759	-0.0002	0.000167033	56287.6	16279.8	0.00607621	0.00072282
	[TA-BD]-[AA-BD]2	Cyclic	18O	C32H44O1118O	[M+Na]+	C32H44O1118ONa	645.279	2.93778e-05	0.00188	2.64575e-05	285029	49621.9	0.0312391	0.00166958
			13C2	C3013C2H44O12		C3013C2H44O12Na	645.279	2.93778e-05	-0.000586667	3.21455e-05	285029	49621.9	0.0312391	0.00166958
	[TA-BD]-[AA-BD]3	Cyclic	18O	C42H60O1518O	[M+Na]+	C42H60O1518ONa	845.383	0.000144421	0.00122667	0.000144338	195537	31452.3	0.0214375	0.000883711
			13C2	C4013C2H60O16		C4013C2H60O16Na	845.383	0.000144421	-0.00123667	0.000141539	195537	31452.3	0.0214375	0.000883711
	[TA-BD]-[AA-BD]4	Cyclic	18O	C52H76O1918O	[M+Na]+	C52H76O1918ONa	1045.49	0.000196291	0.00153667	0.000196554	109425	8606.92	0.0121114	0.00118378
			13C2	C5013C2H76O20		C5013C2H76O20Na	1045.49	0.000196291	-0.000933333	0.000196554	109425	8606.92	0.0121114	0.00118378
	[TA-BD]-[AA-BD]5	Cyclic	18O	C62H92O2318O	[M+Na]+	C62H92O2318ONa	1245.59	0.000380311	0.00219333	0.000378594	47571.9	5313.23	0.00524501	0.000344052
			13C2	C6013C2H92O24		C6013C2H92O24Na	1245.59	0.000380311	-0.000276667	0.000378594	47571.9	5313.23	0.00524501	0.000344052
5	[TA-BD]2	Cyclic		C24H24O8	[M+NH4]+	C24H28O8N	458.181	1.93657e-05	-5e-05	2e-05	761913	94384	0.0841381	0.0091949	6.62265e-06	5.77087e-06	0.00787117
	[TA-BD]2-[AA-BD]	Cyclic		C34H40O12	[M+NH4]+	C34H44O12N	658.286	3.42769e-05	0	3.60555e-05	3.08914e+06	288561	0.342599	0.0472408
	[TA-BD]2-[AA-BD]2	Cyclic		C44H56O16	[M+NH4]+	C44H60O16N	858.39	4.432e-05	-0.00038	4.3589e-05	2.45054e+06	225739	0.271774	0.0371856	0.00326268	0.00565113	1.20051
	[TA-BD]2-[AA-BD]3	Cyclic		C54H72O20	[M+NH4]+	C54H76O20N	1058.5	0.00010891	-0.000336667	0.000109697	933571	84939.8	0.103687	0.0158361
	[TA-BD]2-[AA-BD]4	Cyclic		C64H88O24	[M+NH4]+	C64H92O24N	1258.6	9.96042e-05	-0.000156667	9.81495e-05	361748	26158.5	0.0402915	0.00686594
	[TA-BD]2-[AA-BD]5	Cyclic		C74H104O28	[M+NH4]+	C74H108O28N	1458.71	0.000268437	0.00046	0.000269629	100615	16022.8	0.0112872	0.00311724
5a	[TA-BD]2	Cyclic	13C	C2313CH24O8	[M+NH4]+	C2313CH28O8N	459.184	1.44253e-05	-0.000113333	1.52753e-05	175892	23704.2	0.0194871	0.00313555
	[TA-BD]2-[AA-BD]	Cyclic	13C	C3313CH40O12	[M+NH4]+	C3313CH44O12N	659.289	3.00888e-05	1.33333e-05	3.21455e-05	1.11776e+06	126436	0.123508	0.0131014
	[TA-BD]2-[AA-BD]2	Cyclic	13C	C4313CH56O16	[M+NH4]+	C4313CH60O16N	859.394	4.42126e-05	-0.00034	4.3589e-05	1.17869e+06	89615.2	0.131025	0.019993	0.00146712	0.00254113	1.11973
	[TA-BD]2-[AA-BD]3	Cyclic	13C	C5313CH72O20	[M+NH4]+	C5313CH76O20N	1059.5	8.70306e-05	-0.000376667	8.5049e-05	572006	79646	0.0634135	0.0108785
	[TA-BD]2-[AA-BD]4	Cyclic	13C	C6313CH88O24	[M+NH4]+	C6313CH92O24N	1259.6	6.43739e-05	-3.33333e-05	6.50641e-05	274500	25320.8	0.030512	0.00494534
	[TA-BD]2-[AA-BD]5	Cyclic	13C	C7313CH104O28	[M+NH4]+	C7313CH108O28N	1459.71	0.000731318	0.000426667	0.000728171	85831.4	4754.54	0.00952596	0.00114663
5b	[TA-BD]2-[AA-BD]	Cyclic	18O	C34H40O1118O	[M+NH4]+	C34H44O1118ON	660.292	8.48943e-05	0.00197667	8.5049e-05	198443	34918.7	0.0219569	0.00410924
			13C2	C3213C2H40O12		C3213C2H44O12N	660.292	8.48943e-05	-0.000483333	8.5049e-05	198443	34918.7	0.0219569	0.00410924
	[TA-BD]2-[AA-BD]2	Cyclic	18O	C44H56O1518O	[M+NH4]+	C44H60O1518ON	860.396	0.000134557	0.00156667	0.000136504	305156	25566.8	0.0340219	0.00631266	0.000313118	0.000542337	0.920342
			13C2	C4213C2H56O16		C4213C2H60O16N	860.396	0.000134557	-0.000896667	0.000133167	305156	25566.8	0.0340219	0.00631266	0.000313118	0.000542337	0.920342
	[TA-BD]2-[AA-BD]3	Cyclic	18O	C54H72O1918O	[M+NH4]+	C54H76O1918ON	1060.5	0.000120337	0.00143667	0.000120968	169001	29229.3	0.0187434	0.00385297
			13C2	C5213C2H72O20		C5213C2H76O20N	1060.5	0.000120337	-0.00102667	0.000119304	169001	29229.3	0.0187434	0.00385297
	[TA-BD]2-[AA-BD]4	Cyclic	18O	C64H88O2318O	[M+NH4]+	C64H92O2318ON	1260.61	5.56507e-05	0.00159	5.56776e-05	114192	4260.65	0.0128107	0.00269668
			13C2	C6213C2H88O24		C6213C2H92O24N	1260.61	5.56507e-05	-0.000876667	5.68624e-05	114192	4260.65	0.0128107	0.00269668
6	[TA-BD]2	Cyclic		C24H24O8	[M+Na]+	C24H24O8Na	463.136	1.7512e-05	-0.000103333	1.52753e-05	694496	115118	0.076211	0.00475182	1.35609e-05	6.82154e-06	0.0177939
	[TA-BD]2-[AA-BD]	Cyclic		C34H40O12	[M+Na]+	C34H40O12Na	663.241	1.0856e-05	-1.66667e-05	1.1547e-05	3.0533e+06	490941	0.335618	0.0289642
	[TA-BD]2-[AA-BD]2	Cyclic		C44H56O16	[M+Na]+	C44H56O16Na	863.346	3.43699e-05	-0.00035	3.4641e-05	1.95022e+06	243356	0.215112	0.0197285	0.00353198	0.00611757	1.64193
	[TA-BD]2-[AA-BD]3	Cyclic		C54H72O20	[M+Na]+	C54H72O20Na	1063.45	7.48755e-05	-0.000143333	7.37111e-05	766932	119666	0.0842204	0.00478019
	[TA-BD]2-[AA-BD]4	Cyclic		C64H88O24	[M+Na]+	C64H88O24Na	1263.56	0.000117721	-6.66667e-06	0.000120139	325872	30116.4	0.0360366	0.00349096
	[TA-BD]2-[AA-BD]5	Cyclic		C74H104O28	[M+Na]+	C74H104O28Na	1463.66	0.000228974	0.000773333	0.00022942	87014.1	15917.1	0.00954363	0.000840437
6a	[TA-BD]2	Cyclic	13C	C2313CH24O8	[M+Na]+	C2313CH24O8Na	464.14	3.37334e-05	-0.000156667	3.51188e-05	163629	25788.7	0.0180087	0.00184263
	[TA-BD]2-[AA-BD]	Cyclic	13C	C3313CH40O12	[M+Na]+	C3313CH40O12Na	664.245	2.81489e-05	3.66667e-05	2.88675e-05	1.07922e+06	157340	0.118951	0.0128519
	[TA-BD]2-[AA-BD]2	Cyclic	13C	C4313CH56O16	[M+Na]+	C4313CH56O16Na	864.349	2.05007e-05	-0.00028	2e-05	891346	95811.7	0.0985048	0.0100675	0.00169145	0.00292967	1.71712
	[TA-BD]2-[AA-BD]3	Cyclic	13C	C5313CH72O20	[M+Na]+	C5313CH72O20Na	1064.45	0.000146977	-3.33333e-05	0.000150444	429139	56872.5	0.0472975	0.00420287
	[TA-BD]2-[AA-BD]4	Cyclic	13C	C6313CH88O24	[M+Na]+	C6313CH88O24Na	1264.56	0.00014095	0.000213333	0.000140475	229641	38457.5	0.0252189	0.00205866
	[TA-BD]2-[AA-BD]5	Cyclic	13C	C7313CH104O28	[M+Na]+	C7313CH104O28Na	1464.66	9.31504e-05	0.00100667	9.29157e-05	70342.3	12136.3	0.00775036	0.0010708
6b	[TA-BD]2-[AA-BD]	Cyclic	18O	C34H40O1118O	[M+Na]+	C34H40O1118ONa	665.247	5.4755e-05	0.00186667	5.68624e-05	192757	30677.6	0.0211736	0.0014851
			13C2	C3213C2H40O12		C3213C2H40O12Na	665.247	5.4755e-05	-0.000596667	5.1316e-05	192757	30677.6	0.0211736	0.0014851
	[TA-BD]2-[AA-BD]2	Cyclic	18O	C44H56O1518O	[M+Na]+	C44H56O1518ONa	865.352	3.31652e-05	0.00158	3e-05	225851	34461.7	0.0248384	0.00202269	0.000370831	0.000642298	1.49297
			13C2	C4213C2H56O16		C4213C2H56O16Na	865.352	3.31652e-05	-0.000886667	3.51188e-05	225851	34461.7	0.0248384	0.00202269
	[TA-BD]2-[AA-BD]3	Cyclic	18O	C54H72O1918O	[M+Na]+	C54H72O1918ONa	1065.46	3.36056e-05	0.00213333	6.50641e-05	140332	18144.5	0.0154881	0.00166073
			13C2	C5213C2H72O20		C5213C2H72O20Na	1065.46	3.36056e-05	-0.00015	0.00028688	140332	18144.5	0.0154881	0.00166073
	[TA-BD]2-[AA-BD]4	Cyclic	18O	C64H88O2318O	[M+Na]+	C64H88O2318ONa	1265.56	0.000255312	0.00216667	0.000257358	83830.4	9046.39	0.00933589	0.00177698
			13C2	C6213C2H88O24		C6213C2H88O24Na	1265.56	0.000255312	-0.0003	0.000251595	83830.4	9046.39	0.00933589	0.00177698
7	[AA-BD]	Cyclic		C10H16O4	[M+C2H7N2]+	C12H23O4N2	259.165	3.55507e-05	-7.33333e-05	3.51188e-05	99879.9	9253.18	0.0112331	0.00281191	4.65833e-05	1.13581e-05	0.414696
	[AA-BD]2	Cyclic		C20H32O8	[M+C2H7N2]+	C22H39O8N2	459.27	3.68877e-05	-8.66667e-05	3.78594e-05	852265	25004.8	0.0950815	0.0160402	3.27227e-05	5.66775e-05	0.0344155
	[AA-BD]3	Cyclic		C30H48O12	[M+C2H7N2]+	C32H55O12N2	659.375	7.26546e-05	-8.33333e-05	7.50555e-05	504592	9729.73	0.05649	0.0108824	4.81902e-05	8.34678e-05	0.0853074
	[AA-BD]4	Cyclic		C40H64O16	[M+C2H7N2]+	C42H71O16N2	859.48	6.76646e-05	-0.000136667	6.65833e-05	84933.4	5531.23	0.00941659	0.00105492
8	[TA-BD]-[AA-BD]	Cyclic		C22H28O8	[M+C2H7N2]+	C24H35O8N2	479.239	6.85744e-05	-6.66667e-05	7.0946e-05	468755	35039.9	0.0519686	0.00620762	0.00277256	0.00480221	5.33507
	[TA-BD]-[AA-BD]2	Cyclic		C32H44O12	[M+C2H7N2]+	C34H51O12N2	679.343	9.69214e-05	-0.000226667	9.50438e-05	628788	30253.1	0.0704627	0.0147413
	[TA-BD]-[AA-BD]3	Cyclic		C42H60O16	[M+C2H7N2]+	C44H67O16N2	879.448	0.000178573	-0.000326667	0.00018037	164206	21933.8	0.0186153	0.00566577
	[TA-BD]-[AA-BD]4	Cyclic		C52H76O20	[M+C2H7N2]+	C54H83O20N2	1079.55	0.000210795	-0.000286667	0.000209841	35904.4	3568.85	0.00404948	0.00108113
	[TA-BD]-[AA-BD]5	Cyclic		C62H92O24	[M+C2H7N2]+	C64H99O24N2	1279.66	0.000645117	-0.000416667	0.000644851	11722.7	508.026	0.00130854	0.000222383
8a	[TA-BD]-[AA-BD]	Cyclic	13C	C2113CH28O8	[M+C2H7N2]+	C2313CH35O8N2	480.242	5.59654e-05	-5e-05	5.56776e-05	104493	1938.84	0.0116902	0.00220918	0.000703751	0.00121893	6.02
	[TA-BD]-[AA-BD]2	Cyclic	13C	C3113CH44O12	[M+C2H7N2]+	C3313CH51O12N2	680.347	1.37391e-05	0.000266667	1.52753e-05	264366	14791.6	0.0297209	0.00679641
	[TA-BD]-[AA-BD]3	Cyclic	13C	C4113CH60O16	[M+C2H7N2]+	C4313CH67O16N2	880.452	0.000267989	-0.00027	0.000272213	70774	3171.13	0.00794083	0.00170904
	[TA-BD]-[AA-BD]4	Cyclic	13C	C5113CH76O20	[M+C2H7N2]+	C5313CH83O20N2	1080.56	0.000500242	-0.000396667	0.000497024	18163.5	1162.17	0.00203591	0.000441857
9	Me-[LA]7	Linear		C22H32O15	[M+NH4]+	C22H36O15N	554.208	3.62387e-05	-9e-05	3.4641e-05	3.2773e+06	342760	0.362873	0.0449477
	Me-[LA]7-[AA-BD]	Linear		C32H48O19	[M+NH4]+	C32H52O19N	754.312	9.5292e-05	-0.00034	9.53939e-05	59674.3	15266.3	0.00647392	0.000785674
	Me-[LA]7-[AA-BD]2	Linear		C42H64O23	[M+NH4]+	C42H68O23N	954.417	0.0001155	-0.000463333	0.000118462	58491.3	5250.38	0.00647964	0.000762191
	Me-[LA]7-[AA-BD]3	Linear		C52H80O27	[M+NH4]+	C52H84O27N	1154.52	0.000141019	-0.00032	0.00014	96216.2	14442.7	0.0108407	0.00285702	0.00229428	0.0039738	21.1635
	Me-[LA]7-[AA-BD]4	Linear		C62H96O31	[M+NH4]+	C62H100O31N	1354.63	0.000266466	0.00039	0.000261534	18991.2	9606.72	0.00201676	0.000681109
10	[TA-BD]3	Cyclic		C36H36O12	[M+NH4]+	C36H40O12N	678.254	1.45351e-05	-0.000193333	1.1547e-05	449957	38515.5	0.0498445	0.00581907
	[TA-BD]3-[AA-BD]	Cyclic		C46H52O16	[M+NH4]+	C46H56O16N	878.359	1.41231e-05	-0.000443333	1.52753e-05	537792	47473.8	0.0600296	0.0118845
	[TA-BD]3-[AA-BD]2	Cyclic		C56H68O20	[M+NH4]+	C56H72O20N	1078.46	7.12203e-05	-0.000426667	7.0946e-05	464981	39843.5	0.0519369	0.0104877
	[TA-BD]3-[AA-BD]3	Cyclic		C66H84O24	[M+NH4]+	C66H88O24N	1278.57	9.69072e-05	-0.000216667	9.60902e-05	282359	18616.7	0.0316577	0.00695342	0.000150491	0.000260658	0.475369
	[TA-BD]3-[AA-BD]4	Cyclic		C76H100O28	[M+NH4]+	C76H104O28N	1478.67	0.00013946	0.0006	0.000137477	97450.9	8738.81	0.0107878	0.00119011
10a	[TA-BD]3	Cyclic	13C	C3513CH36O12	[M+NH4]+	C3513CH40O12N	679.258	4.28144e-05	-0.000216667	4.04145e-05	178256	8533.07	0.0198029	0.00256483
	[TA-BD]3-[AA-BD]	Cyclic	13C	C4513CH52O16	[M+NH4]+	C4513CH56O16N	879.362	4.82071e-05	-0.000363333	5.1316e-05	271441	34839.1	0.0301707	0.00565596
	[TA-BD]3-[AA-BD]2	Cyclic	13C	C5513CH68O20	[M+NH4]+	C5513CH72O20N	1079.47	8.72296e-05	-0.00038	8.544e-05	272321	25373.1	0.0302095	0.00425522
	[TA-BD]3-[AA-BD]3	Cyclic	13C	C6513CH84O24	[M+NH4]+	C6513CH88O24N	1279.57	0.000246403	-6e-05	0.000244336	197008	13305.7	0.0220924	0.00489387	4.72689e-05	8.18722e-05	0.21396
	[TA-BD]3-[AA-BD]4	Cyclic	13C	C7513CH100O28	[M+NH4]+	C7513CH104O28N	1479.68	0.00026126	0.000633333	0.000260832	72154.2	15410.7	0.00819933	0.00303971
10b	[TA-BD]3	Cyclic	18O	C36H36O1118O	[M+NH4]+	C36H40O1118ON	680.261	0.000441418	0.00196	0.000441362	22716.7	2781.72	0.0025238	0.000450958
			13C2	C3413C2H36O12		C3413C2H40O12N	680.261	0.000441418	-0.0005	0.000441362	22716.7	2781.72	0.0025238	0.000450958
	[TA-BD]3-[AA-BD]	Cyclic	18O	C46H52O1518O	[M+NH4]+	C46H56O1518ON	880.366	0.00011892	0.00191667	0.000119304	74473.7	15021.4	0.00822198	0.0015889
			13C2	C4413C2H52O16		C4413C2H56O16N	880.366	0.00011892	-0.00055	0.000115326	74473.7	15021.4	0.00822198	0.0015889
	[TA-BD]3-[AA-BD]2	Cyclic	18O	C56H68O1918O	[M+NH4]+	C56H72O1918ON	1080.47	9.15715e-05	0.00159333	9.29157e-05	95901.2	2187.95	0.0106902	0.00167176
			13C2	C5413C2H68O20		C5413C2H72O20N	1080.47	9.15715e-05	-0.000873333	8.96289e-05	95901.2	2187.95	0.0106902	0.00167176
	[TA-BD]3-[AA-BD]3	Cyclic	18O	C66H84O2318O	[M+NH4]+	C66H88O2318ON	1280.58	0.000479277	0.00201333	0.000480451	81099.7	12334.2	0.00907544	0.00232452
			13C2	C6413C2H84O24		C6413C2H88O24N	1280.58	0.000479277	-0.00045	0.000481352	81099.7	12334.2	0.00907544	0.00232452
11	[TA-BD]3	Cyclic		C36H36O12	[M+Na]+	C36H36O12Na	683.21	1.96543e-05	-0.000213333	2.08167e-05	243709	44961.4	0.0266887	0.00163342
	[TA-BD]3-[AA-BD]	Cyclic		C46H52O16	[M+Na]+	C46H52O16Na	883.315	8.55279e-05	3e-05	8.544e-05	497129	63990.2	0.054838	0.00538288
	[TA-BD]3-[AA-BD]2	Cyclic		C56H68O20	[M+Na]+	C56H68O20Na	1083.42	8.54478e-05	-0.000203333	8.5049e-05	371542	35830.7	0.0411754	0.00540287
	[TA-BD]3-[AA-BD]3	Cyclic		C66H84O24	[M+Na]+	C66H84O24Na	1283.52	0.000143628	1.33333e-05	0.000145029	258266	19783.6	0.0286735	0.00398064	0.000366423	0.000634664	1.27792
	[TA-BD]3-[AA-BD]4	Cyclic		C76H100O28	[M+Na]+	C76H100O28Na	1483.63	9.79864e-05	0.000546667	9.86577e-05	88094.3	4481.04	0.00979806	0.00142362
	[TA-BD]3-[AA-BD]5	Cyclic		C86H116O32	[M+Na]+	C86H116O32Na	1683.73	0.000567548	0.00063	0.000571927	17803.3	4420.48	0.00193133	0.00015391
11a	[TA-BD]3	Cyclic	13C	C3513CH36O12	[M+Na]+	C3513CH36O12Na	684.213	5.52946e-05	-0.000193333	5.50757e-05	92977.5	8450.16	0.0102763	0.000884019
	[TA-BD]3-[AA-BD]	Cyclic	13C	C4513CH52O16	[M+Na]+	C4513CH52O16Na	884.318	2.355e-05	1.66667e-05	2.51661e-05	247708	28507.3	0.0274275	0.00373853
	[TA-BD]3-[AA-BD]2	Cyclic	13C	C5513CH68O20	[M+Na]+	C5513CH68O20Na	1084.42	6.52865e-05	-0.000216667	6.65833e-05	228709	21540.6	0.0253017	0.00265266
	[TA-BD]3-[AA-BD]3	Cyclic	13C	C6513CH84O24	[M+Na]+	C6513CH84O24Na	1284.53	0.000160301	0	0.000165227	171957	12226.7	0.0190541	0.00208075	0.000235987	0.000408741	1.23851
	[TA-BD]3-[AA-BD]4	Cyclic	13C	C7513CH100O28	[M+Na]+	C7513CH100O28Na	1484.63	0.000183873	0.00102667	0.000185562	73856	4249.03	0.00822411	0.00125822
`11b	[TA-BD]3	Cyclic	18O	C36H36O1118O	[M+Na]+	C36H36O1118ONa	685.216	4.26559e-05	0.00174333	4.50925e-05	23255.5	3772.89	0.00259471	0.000631823
			13C2	C3413C2H36O12		C3413C2H36O12Na	685.216	4.26559e-05	-0.000216667	0.000846188	23255.5	3772.89	0.00259471	0.000631823
	[TA-BD]3-[AA-BD]	Cyclic	18O	C46H52O1518O	[M+Na]+	C46H52O1518ONa	885.321	6.50521e-05	0.00194667	6.65833e-05	63985	5819.84	0.0072215	0.00189793
			13C2	C4413C2H52O16		C4413C2H52O16Na	885.321	6.50521e-05	-0.00052	6.55744e-05	63985	5819.84	0.0072215	0.00189793
	[TA-BD]3-[AA-BD]2	Cyclic	18O	C56H68O1918O	[M+Na]+	C56H68O1918ONa	1085.43	7.35686e-05	0.00197333	7.02377e-05	67349.5	7779.48	0.00749643	0.00142976
			13C2	C5413C2H68O20		C5413C2H68O20Na	1085.43	7.35686e-05	-0.000113333	0.000592818	67349.5	7779.48	0.00749643	0.00142976
	[TA-BD]3-[AA-BD]3	Cyclic	18O	C66H84O2318O	[M+Na]+	C66H84O2318ONa	1285.53	8.3863e-05	0.00242333	7.57188e-05	68310.5	14023	0.00748069	0.000784881
			13C2	C6413C2H84O24		C6413C2H84O24Na	1285.53	8.3863e-05	-4e-05	8.7178e-05	68310.5	14023	0.00748069	0.000784881
12	BD-[TA-BD]2-[AA-BD]	Linear		C38H50O14	[M+NH4]+	C38H54O14N	748.354	3.92327e-05	-0.000376667	3.51188e-05	357818	18421	0.0400091	0.00779179
	BD-[TA-BD]2-[AA-BD]2	Linear		C48H66O18	[M+NH4]+	C48H70O18N	948.458	9.69629e-05	-0.000533333	9.29157e-05	187009	13869.4	0.0208872	0.00408801
	BD-[TA-BD]2-[AA-BD]3	Linear		C58H82O22	[M+NH4]+	C58H86O22N	1148.56	0.000196917	-0.00044	0.000199249	167727	30042	0.0189178	0.00533959	0.00212857	0.00368679	11.2517
	BD-[TA-BD]2-[AA-BD]4	Linear		C68H98O26	[M+NH4]+	C68H102O26N	1348.67	0.000140863	-9.66667e-05	0.000141892	23769.3	4973.92	0.00265332	0.000686447
12a	BD-[TA-BD]2-[AA-BD]	Linear		C3713CH50O14	[M+NH4]+	C3713CH54O14N	749.357	0.00015455	-0.000406667	0.000155027	155314	15710.4	0.0175525	0.0047725
	BD-[TA-BD]2-[AA-BD]2	Linear		C4713CH66O18	[M+NH4]+	C4713CH70O18N	949.461	0.000195643	-0.00062	0.000194679	112582	9707.15	0.0124709	0.0014559
	BD-[TA-BD]2-[AA-BD]3	Linear		C5713CH82O22	[M+NH4]+	C5713CH86O22N	1149.57	0.000137706	-0.000426667	0.000138684	119540	21702.1	0.0132643	0.00275369	0.00135817	0.00235242	10.2393
	BD-[TA-BD]2-[AA-BD]4	Linear		C6713CH98O26	[M+NH4]+	C6713CH102O26N	1349.67	0.000967188	-5.33333e-05	0.000628517	19061.4	10308.7	0.00225118	0.0015684
13	[TA-BD]2-[AA-BD]	Cyclic		C34H40O12	[M+C2H7N2]+	C36H47O12N2	699.312	7.25151e-05	-0.000156667	7.0946e-05	115598	13685.8	0.0130649	0.00374076
	[TA-BD]2-[AA-BD]2	Cyclic		C44H56O16	[M+C2H7N2]+	C46H63O16N2	899.417	0.00010893	-0.000313333	0.000109697	100855	11788.9	0.0114048	0.00312205	0.000296044	0.000512763	2.59578
	[TA-BD]2-[AA-BD]3	Cyclic		C54H72O20	[M+C2H7N2]+	C56H79O20N2	1099.52	6.4392e-05	-0.000436667	6.35085e-05	36633.7	4120.29	0.00409536	0.000915404
	[TA-BD]2-[AA-BD]4	Cyclic		C64H88O24	[M+C2H7N2]+	C66H95O24N2	1299.63	0.000433917	0.00024	0.000434051	16878.5	526.092	0.0018872	0.00035467
14	BD-[AA-BD]	Linear		C14H26O6	[M+Na]+	C14H26O6Na	313.162	1.71652e-05	-0.00021	2e-05	274784	75083.1	0.0309622	0.0104598	0.00493902	0.00851805	15.9518
	BD-[AA-BD]2	Linear		C24H42O10	[M+Na]+	C24H42O10Na	513.267	9.95515e-05	-0.00012	0.000103923	124393	16577.4	0.0137099	0.00123267	6.6296e-05	0.000101916	0.483562
	BD-[AA-BD]3	Linear		C34H58O14	[M+Na]+	C34H58O14Na	713.372	4.22796e-05	-9.33333e-05	3.78594e-05	89059.9	11502.2	0.00980132	0.000517139
	BD-[AA-BD]4	Linear		C44H74O18	[M+Na]+	C44H74O18Na	913.477	0.000255525	-7e-05	0.000252389	20933.4	10587.8	0.00235712	0.00125289
15	BD-[TA-BD]	Linear		C16H22O6	[M+Na]+	C16H22O6Na	333.131	0.000103362	2e-05	0.000105357	12220.2	2671.6	0.00133156	6.34382e-05	2.63466e-05	4.56336e-05	1.97863
	BD-[TA-BD]-[AA-BD]	Linear		C26H38O10	[M+Na]+	C26H38O10Na	533.236	2.08612e-05	-6.33333e-05	2.08167e-05	145189	16464.4	0.0160217	0.00135349	4.38184e-05	7.58957e-05	0.273494
	BD-[TA-BD]-[AA-BD]2	Linear		C36H54O14	[M+Na]+	C36H54O14Na	733.341	2.8198e-05	-6.66667e-05	3.05505e-05	537920	111105	0.0602261	0.0161795	0.0123593	0.0214069	20.5215
	BD-[TA-BD]-[AA-BD]3	Linear		C46H70O18	[M+Na]+	C46H70O18Na	933.445	0.000161526	-0.000176667	0.000160104	92719.6	17276.6	0.0101595	0.000784586
	BD-[TA-BD]-[AA-BD]4	Linear		C56H86O22	[M+Na]+	C56H86O22Na	1133.55	0.000149963	-3.33333e-06	0.000148436	33717	5793.86	0.00379402	0.00114329
16	BD-[TA-BD]2	Linear		C28H34O10	[M+Na]+	C28H34O10Na	553.204	0.000146522	-6e-05	0.000147986	41762.6	14199.8	0.00451864	0.000913189
	BD-[TA-BD]2-[AA-BD]	Linear		C38H50O14	[M+Na]+	C38H50O14Na	753.309	8.70446e-05	-0.00036	8.544e-05	156376	38632.2	0.0169945	0.00133314
	BD-[TA-BD]2-[AA-BD]2	Linear		C48H66O18	[M+Na]+	C48H66O18Na	953.414	8.78958e-05	-0.00035	8.88819e-05	102815	7876.27	0.0114125	0.00149505
	BD-[TA-BD]2-[AA-BD]3	Linear		C58H82O22	[M+Na]+	C58H82O22Na	1153.52	3.62261e-05	-0.00024	3.60555e-05	156129	30370.6	0.017497	0.00462294	0.00361293	0.00625778	20.6488
	BD-[TA-BD]2-[AA-BD]4	Linear		C68H98O26	[M+Na]+	C68H98O26Na	1353.62	0.000144894	-6e-05	0.000145258	23781.3	8103.5	0.00258593	0.000622729
17	BD-[TA-BD]-[AA-BD]	Linear		C26H38O10	[M+NH4]+	C26H42O10N	528.28	4.48032e-05	-5.33333e-05	4.72582e-05	108803	26537.9	0.0119436	0.00226913
	BD-[TA-BD]-[AA-BD]2	Linear		C36H54O14	[M+NH4]+	C36H58O14N	728.385	6.97457e-05	-9e-05	7.2111e-05	688732	75906.3	0.0773087	0.017552	0.00730979	0.0126609	9.45533
	BD-[TA-BD]-[AA-BD]3	Linear		C46H70O18	[M+NH4]+	C46H74O18N	928.49	0.000129529	-0.00038	0.00013	132075	12409.8	0.0145969	0.00129773
	BD-[TA-BD]-[AA-BD]4	Linear		C56H86O22	[M+NH4]+	C56H90O22N	1128.59	0.000172349	-0.000436667	0.000170392	35070.7	8846.42	0.00394269	0.00140746
18	[TA-BD]-[AA-BD]	Linear		C22H30O9	[M+NH4]+	C22H34O9N	456.223	5.78121e-05	-8.33333e-05	5.85947e-05	185807	60165.5	0.0210815	0.00825904	0.00366786	0.00635291	17.3984
	[TA-BD]-[AA-BD]2	Linear		C32H46O13	[M+NH4]+	C32H50O13N	656.328	8.46087e-05	-0.000126667	8.5049e-05	83900.9	4185.7	0.00934005	0.00138616
	[TA-BD]-[AA-BD]3	Linear		C42H62O17	[M+NH4]+	C42H66O17N	856.432	0.000200358	-0.000413333	0.000189033	60967.7	17432.5	0.00690199	0.0028521
	[TA-BD]-[AA-BD]4	Linear		C52H78O21	[M+NH4]+	C52H82O21N	1056.54	0.000542003	-0.000736667	0.000545008	15606.5	2199.16	0.00176426	0.000489271
U1							281.147	2.23236e-05			82965	14826.5	0.00909109	0.000823651	0	0	0
							481.252	1.64739e-05			528079	59216.7	0.0582393	0.00415452
							681.357	1.92759e-05			187355	20615.6	0.020661	0.00139186
							881.461	0.000226182			41988.5	13291.3	0.00456293	0.000919024	5.09259e-06	8.82062e-06	0.111608
U2							534.239	0.000107996			28933.4	8060.98	0.00312915	0.000416754
							734.344	9.56519e-05			205171	53628.3	0.0227649	0.00640049	0.00453258	0.00785065	19.9104
							934.449	0.000160046			40929.4	10611	0.00446177	0.000628761
							1134.55	0.000447577			14734.6	3275.54	0.00160351	7.14362e-05
U3							666.25	0.000627727			20326.2	5775.92	0.00219612	0.000284931
							866.355	0.000206949			40302.5	9944.59	0.00442073	0.000823977
							1066.46	0.000622519			15521.4	7619.77	0.00164834	0.000524806
							1266.57	0.00033759			14521.2	3695.48	0.00157561	0.000120555

## Sheet: 5. DI-Orbitrap-MS PBT
Sequence	Structure	Type	Isotope	Molecular formula	Adduct	Elemental Composition	Average (n=3) ± 1SD								BLANK Average (n=3) ± 1SD
							Average m/z	±SD	Average δ / Da	±SD	Average Intensity	±SD	Average Normalised Intensity (IS)	±SD	Average Normalised Intensity (IS)	±SD	Normalised Contribution to Extract (IS) / %
1	[AA-BD]2	Cyclic		C20H32O8	[M+Na]+	C20H32O8Na	423.199	7.50355e-06	-4e-05	1e-05	36975196	4.09998e+06	4.07906	0.308439	0.000242272	0.000266714	0.00593942
	[AA-BD]2-[TA-BD]	Cyclic		C32H44O12	[M+Na]+	C32H44O12Na	643.272	1.09083e-05	-6.33333e-05	1.1547e-05	5.1735e+06	746296	0.568782	0.0332836
	[AA-BD]2-[TA-BD]2	Cyclic		C44H56O16	[M+Na]+	C44H56O16Na	863.346	3.43699e-05	-0.00035	3.4641e-05	1.95022e+06	243356	0.215112	0.0197285
	[AA-BD]2-[TA-BD]3	Cyclic		C56H68O20	[M+Na]+	C56H68O20Na	1083.42	8.54478e-05	-0.000203333	8.5049e-05	371542	35830.7	0.0411754	0.00540287
1a	[AA-BD]2	Cyclic	13C	C1913CH32O8	[M+Na]+	C1913CH32O8Na	424.202	6.0025e-06	-3.33333e-06	5.7735e-06	8.13047e+06	851929	0.897681	0.0747001
	[AA-BD]2-[TA-BD]	Cyclic	13C	C3113CH44O12	[M+Na]+	C3113CH44O12Na	644.276	1.31348e-05	-5.33333e-05	1.1547e-05	1729901	242318	0.190394	0.014169
	[AA-BD]2-[TA-BD]2	Cyclic	13C	C4313CH56O16	[M+Na]+	C4313CH56O16Na	864.349	2.05007e-05	-0.000253333	3.05505e-05	891346	95811.7	0.0985048	0.0100675
	[AA-BD]2-[TA-BD]3	Cyclic	13C	C5513CH68O20	[M+Na]+	C5513CH68O20Na	1084.42	6.52865e-05	-0.000216667	6.65833e-05	228709	21540.6	0.0253017	0.00265266
1b	[AA-BD]2	Cyclic	18O	C20H32O718O	[M+Na]+	C20H32O718ONa	425.207	0.000846894	0.00373167	0.000837262	124177	99876.1	0.0144961	0.0135861
			13C2	C1813C2H32O8		C1813C2H32O8Na	425.207	0.000846894	0.00126333	0.000846778	124177	99876.1	0.0144961	0.0135861
	[AA-BD]2-[TA-BD]	Cyclic	18O	C32H44O1118O	[M+Na]+	C32H44O1118ONa	645.279	2.93778e-05	0.00188	2.64575e-05	285029	49621.9	0.0312391	0.00166958
			13C2	C3013C2H44O12		C3013C2H44O12Na	645.279	2.93778e-05	-0.000586667	3.21455e-05	285029	49621.9	0.0312391	0.00166958
	[AA-BD]2-[TA-BD]2	Cyclic	18O	C44H56O1518O	[M+Na]+	C44H56O1518ONa	865.352	3.31652e-05	0.00158	3e-05	225851	34461.7	0.0248384	0.00202269
			13C2	C4213C2H56O16		C4213C2H56O16Na	865.352	3.31652e-05	-0.00092	7e-05	225851	34461.7	0.0248384	0.00202269
	[AA-BD]2-[TA-BD]3	Cyclic	18O	C56H68O1918O	[M+Na]+	C56H68O1918ONa	1085.43	7.35686e-05	0.00197333	7.02377e-05	67349.5	7779.48	0.00749643	0.00142976
			13C2	C5413C2H68O20		C5413C2H68O20Na	1085.43	7.35686e-05	-0.000493333	7.50555e-05	67349.5	7779.48	0.00749643	0.00142976
2	[AA-BD]2	Cyclic		C20H32O8	[M+NH4]+	C20H36O8N	418.244	1.00321e-05	3.33333e-05	1.1547e-05	1.2313e+07	984728	1.36738	0.196978	2.83558e-05	1.45636e-05	0.00207373
	[AA-BD]2-[TA-BD]	Cyclic		C32H44O12	[M+NH4]+	C32H48O12N	638.317	2.64593e-05	-9e-05	2.64575e-05	7.39362e+06	613673	0.820417	0.112107
	[AA-BD]2-[TA-BD]2	Cyclic		C44H56O16	[M+NH4]+	C44H60O16N	858.39	4.432e-05	-0.00038	4.3589e-05	2.45054e+06	225739	0.271774	0.0371856	0.00326268	0.00565113	1.20051
	[AA-BD]2-[TA-BD]3	Cyclic		C56H68O20	[M+NH4]+	C56H72O20N	1078.46	7.12203e-05	-0.000426667	7.0946e-05	464981	39843.5	0.0519369	0.0104877
2a	[AA-BD]2	Cyclic	13C	C1913CH32O8	[M+NH4]+	C1913CH36O8N	419.247	1.04987e-05	9e-05	1e-05	2.61704e+06	184902	0.290527	0.0389397
	[AA-BD]2-[TA-BD]	Cyclic	13C	C3113CH44O12	[M+NH4]+	C3113CH48O12N	639.32	1.92408e-05	-9.66667e-05	2.08167e-05	2.50652e+06	243002	0.278372	0.0434977	8.03083e-06	1.39098e-05	0.00288493
	[AA-BD]2-[TA-BD]2	Cyclic	13C	C4313CH56O16	[M+NH4]+	C4313CH60O16N	859.394	4.42126e-05	-0.00034	4.3589e-05	1.17869e+06	89615.2	0.131025	0.019993	0.00146712	0.00254113	1.11973
	[AA-BD]2-[TA-BD]3	Cyclic	13C	C5513CH68O20	[M+NH4]+	C5513CH72O20N	1079.47	8.72296e-05	-0.00038	8.544e-05	272321	25373.1	0.0302095	0.00425522
2b	[AA-BD]2	Cyclic	18O	C20H32O718O	[M+NH4]+	C20H36O718ON	420.25	0.00156456	0.00186667	0.00156491	121973	49301.6	0.0140859	0.00685603
			13C2	C1813C2H32O8		C1813C2H36O8N	420.25	0.00156456	-0.000593333	0.00156491	121973	49301.6	0.0140859	0.00685603
	[AA-BD]2-[TA-BD]	Cyclic	18O	C32H44O1118O	[M+NH4]+	C32H48O1118ON	640.323	0.000101032	0.00182	9.84886e-05	428480	52193.7	0.0474543	0.00688722
			13C2	C3013C2H44O12		C3013C2H48O12N	640.323	0.000101032	-0.000646667	0.000104083	428480	52193.7	0.0474543	0.00688722
	[AA-BD]2-[TA-BD]2	Cyclic	18O	C44H56O1518O	[M+NH4]+	C44H60O1518ON	860.396	0.000134557	0.00156667	0.000136504	305156	25566.8	0.0340219	0.00631266	0.000313118	0.000542337	0.920342
			13C2	C4213C2H56O16		C4213C2H60O16N	860.396	0.000134557	-0.000896667	0.000133167	305156	25566.8	0.0340219	0.00631266	0.000313118	0.000542337	0.920342
	[AA-BD]2-[TA-BD]3	Cyclic	18O	C56H68O1918O	[M+NH4]+	C56H72O1918ON	1080.47	9.15715e-05	0.00108333	0.000791033	95901.2	2187.95	0.0106902	0.00167176
			13C2	C5413C2H68O20		C5413C2H72O20N	1080.47	9.15715e-05	-0.000873333	8.96289e-05	95901.2	2187.95	0.0106902	0.00167176
3	[AA-BD]3	Cyclic		C30H48O12	[M+NH4]+	C30H52O12N	618.348	2.32616e-05	-7.33333e-05	2.51661e-05	5.9222e+06	424728	0.658733	0.103251
	[AA-BD]3-[TA-BD]	Cyclic		C42H60O16	[M+NH4]+	C42H64O16N	838.422	3.93566e-05	-0.000456667	3.78594e-05	3.25338e+06	245877	0.362105	0.0598471
	[AA-BD]3-[TA-BD]2	Cyclic		C54H72O20	[M+NH4]+	C54H76O20N	1058.5	0.00010891	-0.000336667	0.000109697	933571	84939.8	0.103687	0.0158361
	[AA-BD]3-[TA-BD]3	Cyclic		C66H84O24	[M+NH4]+	C66H88O24N	1278.57	9.69072e-05	-0.000216667	9.60902e-05	282359	18616.7	0.0316577	0.00695342	0.000150491	0.000260658	0.475369
3a	[AA-BD]3	Cyclic	13C	C2913CH48O12	[M+NH4]+	C2913CH52O12N	619.352	2.86643e-05	-4.33333e-05	3.05505e-05	1.8412e+06	138080	0.204773	0.0322085
	[AA-BD]3-[TA-BD]	Cyclic	13C	C4113CH60O16	[M+NH4]+	C4113CH64O16N	839.425	6.43659e-05	-0.00047	6.08276e-05	1.4571e+06	58738.3	0.162622	0.0285423
	[AA-BD]3-[TA-BD]2	Cyclic	13C	C5313CH72O20	[M+NH4]+	C5313CH76O20N	1059.5	8.70306e-05	-0.000376667	8.5049e-05	572006	79646	0.0634135	0.0108785
	[AA-BD]3-[TA-BD]3	Cyclic	13C	C6513CH84O24	[M+NH4]+	C6513CH88O24N	1279.57	0.000246403	-6e-05	0.000244336	197008	13305.7	0.0220924	0.00489387	4.72689e-05	8.18722e-05	0.21396
3b	[AA-BD]3	Cyclic	18O	C30H48O1118O	[M+NH4]+	C30H52O1118ON	620.354	2.57144e-05	0.00177333	2.3094e-05	290823	15181	0.0326143	0.00702615
			13C2	C2813C2H48O12		C2813C2H52O12N	620.354	2.57144e-05	-0.00069	2.64575e-05	290823	15181	0.0326143	0.00702615
	[AA-BD]3-[TA-BD]	Cyclic	18O	C42H60O1518O	[M+NH4]+	C42H64O1518ON	840.428	8.43052e-05	0.00143667	8.32666e-05	342214	14523.3	0.03812	0.00602618
			13C2	C4013C2H60O16		C4013C2H64O16N	840.428	8.43052e-05	-0.00102667	8.5049e-05	342214	14523.3	0.03812	0.00602618
	[AA-BD]3-[TA-BD]2	Cyclic	18O	C54H72O1918O	[M+NH4]+	C54H76O1918ON	1060.5	0.000120337	0.00143667	0.000120968	169001	29229.3	0.0187434	0.00385297
			13C2	C5213C2H72O20		C5213C2H76O20N	1060.5	0.000120337	-0.00102667	0.000119304	169001	29229.3	0.0187434	0.00385297
	[AA-BD]3-[TA-BD]3	Cyclic	18O	C66H84O2318O	[M+NH4]+	C66H88O2318ON	1280.58	0.000479277	0.00201333	0.000480451	81099.7	12334.2	0.00907544	0.00232452
			13C2	C6413C2H84O24		C6413C2H88O24N	1280.58	0.000479277	-0.00045	0.000481352	81099.7	12334.2	0.00907544	0.00232452
4	[AA-BD]3	Cyclic		C30H48O12	[M+Na]+	C30H48O12Na	623.304	1.31516e-05	-5.66667e-05	1.52753e-05	6.37447e+06	741493	0.702596	0.0459155
	[AA-BD]3-[TA-BD]	Cyclic		C42H60O16	[M+Na]+	C42H60O16Na	843.377	3.31579e-05	-0.000446667	3.51188e-05	2.75815e+06	424755	0.302869	0.0152739
	[AA-BD]3-[TA-BD]2	Cyclic		C54H72O20	[M+Na]+	C54H72O20Na	1063.45	7.48755e-05	-0.000143333	7.37111e-05	766932	119666	0.0842204	0.00478019
	[AA-BD]3-[TA-BD]3	Cyclic		C66H84O24	[M+Na]+	C66H84O24Na	1283.52	0.000143628	1.33333e-05	0.000145029	258266	19783.6	0.0286735	0.00398064	0.000366423	0.000634664	1.27792
4a	[AA-BD]3	Cyclic	13C	C2913CH48O12	[M+Na]+	C2913CH48O12Na	624.307	2.0635e-05	-5.66667e-05	2.08167e-05	1.94646e+06	228367	0.214557	0.0147062
	[AA-BD]3-[TA-BD]	Cyclic	13C	C4113CH60O16	[M+Na]+	C4113CH60O16Na	844.38	3.34112e-05	-0.000433333	3.21455e-05	1.24106e+06	192818	0.136346	0.00893988
	[AA-BD]3-[TA-BD]2	Cyclic	13C	C5313CH72O20	[M+Na]+	C5313CH72O20Na	1064.45	0.000146977	-3.33333e-05	0.000150444	429139	56872.5	0.0472975	0.00420287
	[AA-BD]3-[TA-BD]3	Cyclic	13C	C6513CH84O24	[M+Na]+	C6513CH84O24Na	1284.53	0.000160301	0	0.000165227	171957	12226.7	0.0190541	0.00208075	0.000235987	0.000408741	1.23851
4b	[AA-BD]3	Cyclic	18O	C30H48O1118O	[M+Na]+	C30H48O1118ONa	625.31	4.33851e-05	0.00171667	4.04145e-05	314708	33351.7	0.0347242	0.00256675
			13C2	C2813C2H48O12		C2813C2H48O12Na	625.31	4.33851e-05	-0.000746667	4.50925e-05	314708	33351.7	0.0347242	0.00256675
	[AA-BD]3-[TA-BD]	Cyclic	18O	C42H60O1518O	[M+Na]+	C42H60O1518ONa	845.383	0.000144421	0.00122667	0.000144338	195537	31452.3	0.0214375	0.000883711
			13C2	C4013C2H60O16		C4013C2H60O16Na	845.383	0.000144421	-0.000466667	0.000591974	195537	31452.3	0.0214375	0.000883711
	[AA-BD]3-[TA-BD]2	Cyclic	18O	C54H72O1918O	[M+Na]+	C54H72O1918ONa	1065.46	3.36056e-05	0.00216667	3.51188e-05	140332	18144.5	0.0154881	0.00166073
			13C2	C5213C2H72O20		C5213C2H72O20Na	1065.46	3.36056e-05	-0.0003	3.60555e-05	140332	18144.5	0.0154881	0.00166073
	[AA-BD]3-[TA-BD]3	Cyclic	18O	C66H84O2318O	[M+Na]+	C66H84O2318ONa	1285.53	8.3863e-05	0.00242333	7.57188e-05	68310.5	14023	0.00748069	0.000784881
			13C2	C6413C2H84O24		C6413C2H84O24Na	1285.53	8.3863e-05	-4e-05	8.7178e-05	68310.5	14023	0.00748069	0.000784881
5	[SeA-BD]2	Cyclic		C28H48O8	[M+NH4]+	C28H52O8N	530.369	2.37337e-05	-3.66667e-05	2.08167e-05	3937758	292528	0.437428	0.0629622
	[SeA-BD]2-[TA-BD]	Cyclic		C40H60O12	[M+NH4]+	C40H64O12N	750.442	4.73178e-05	-0.000346667	4.72582e-05	1.77044e+06	194998	0.196036	0.0258867	2.85947e-06	4.95276e-06	0.00145865
	[SeA-BD]2-[TA-BD]2	Cyclic		C52H72O16	[M+NH4]+	C52H76O16N	970.515	4.635e-05	-0.0005	4.3589e-05	380134	28325.4	0.0423358	0.00722929
	[SeA-BD]2-[TA-BD]3	Cyclic		C64H84O20	[M+NH4]+	C64H88O20N	1190.59	0.00021405	-0.000196667	0.000215019	93784.2	7678.01	0.0104971	0.00226146
5a	[SeA-BD]2	Cyclic	13C	C2713CH48O8	[M+NH4]+	C2713CH52O8N	531.372	1.18874e-05	-5.33333e-05	1.52753e-05	1.13308e+06	112731	0.12563	0.0175148
	[SeA-BD]2-[TA-BD]	Cyclic	13C	C3913CH60O12	[M+NH4]+	C3913CH64O12N	751.445	3.33231e-05	-0.000276667	3.78594e-05	751524	81577.2	0.0832029	0.0107251
	[SeA-BD]2-[TA-BD]2	Cyclic	13C	C5113CH72O16	[M+NH4]+	C5113CH76O16N	971.519	0.000123344	-0.000476667	0.000126623	197911	25920.9	0.0221063	0.00506666
	[SeA-BD]2-[TA-BD]3	Cyclic	13C	C6313CH84O20	[M+NH4]+	C6313CH88O20N	1191.59	7.7861e-05	-0.0002	7.93725e-05	49145.1	5646.15	0.00543734	0.0006861
6	[AA-BD]	Cyclic		C10H16O4	[M+NH4]+	C10H20O4N	218.139	4.178e-05	-7.33333e-05	4.16333e-05	14345.2	6229.67	0.00167113	0.000997815	9.63689e-05	3.41946e-05	5.7667
	[AA-BD]-[TA-BD]	Cyclic		C22H28O8	[M+NH4]+	C22H32O8N	438.212	1.63598e-05	-0.000133333	1.52753e-05	5.68857e+06	369586	0.632099	0.0896131	0.0295347	0.0511556	4.67248
	[AA-BD]-[TA-BD]2	Cyclic		C34H40O12	[M+NH4]+	C34H44O12N	658.286	3.42699e-05	0	3.60555e-05	3.08914e+06	288561	0.342599	0.0472408
	[AA-BD]-[TA-BD]3	Cyclic		C46H52O16	[M+NH4]+	C46H56O16N	878.359	1.41121e-05	-0.000443333	1.52753e-05	537792	47473.8	0.0600296	0.0118845
7	[AA-BD]	Cyclic		C10H16O4	[M+Na]+	C10H16O4Na	223.094	2.19092e-05	-8.33333e-05	2.08167e-05	125297	11615.6	0.0138496	0.00124345	0.00129665	0.000314585	9.36237
	[AA-BD]-[TA-BD]	Cyclic		C22H28O8	[M+Na]+	C22H28O8Na	443.168	1.18732e-05	-0.00012	1e-05	3.65719e+06	470389	0.402748	0.0268497	0.019223	0.0332952	4.77296
	[AA-BD]-[TA-BD]2	Cyclic		C34H40O12	[M+Na]+	C34H40O12Na	663.241	1.0856e-05	-1.66667e-05	1.1547e-05	3.0533e+06	490941	0.335618	0.0289642
	[AA-BD]-[TA-BD]3	Cyclic		C46H52O16	[M+Na]+	C46H52O16Na	883.315	8.55279e-05	3e-05	8.544e-05	497129	63990.2	0.054838	0.00538288
8	[SeA-BD]2	Cyclic		C28H48O8	[M+Na]+	C28H48O8Na	535.324	8.46109e-06	-7e-05	1e-05	2.8456e+06	402366	0.312811	0.0153769
	[SeA-BD]2-[TA-BD]	Cyclic		C40H60O12	[M+Na]+	C40H60O12Na	755.397	1.91408e-05	-0.00029	1.73205e-05	1.11287e+06	195613	0.122128	0.0103167
	[SeA-BD]2-[TA-BD]2	Cyclic		C52H72O16	[M+Na]+	C52H72O16Na	975.471	4.83847e-05	-0.000333333	5.03322e-05	245460	22448.9	0.0271475	0.00265887
	[SeA-BD]2-[TA-BD]3	Cyclic		C64H84O20	[M+Na]+	C64H84O20Na	1195.54	0.000177399	-0.000266667	0.00017673	67003.4	7240.1	0.00740086	0.000698485
8a	[SeA-BD]2	Cyclic	13C	C2713CH48O8	[M+Na]+	C2713CH48O8Na	536.327	2.45929e-05	-4e-05	2.64575e-05	813894	117682	0.0894613	0.00482145
	[SeA-BD]2-[TA-BD]	Cyclic	13C	C3913CH60O12	[M+Na]+	C3913CH60O12Na	756.401	5.65128e-05	-0.0003	5.2915e-05	461941	63215.9	0.0508305	0.00324418
	[SeA-BD]2-[TA-BD]2	Cyclic	13C	C5113CH72O16	[M+Na]+	C5113CH72O16Na	976.474	1.21445e-05	-0.000273333	1.52753e-05	141958	12931.8	0.0157384	0.00207585
	[SeA-BD]2-[TA-BD]3	Cyclic	13C	C6313CH84O20	[M+Na]+	C6313CH84O20Na	1196.55	0.000333788	-0.0001	0.000337194	38407	3985	0.00423845	0.000310766
9	[AA-BD]4	Cyclic		C40H64O16	[M+NH4]+	C40H68O16N	818.453	7.94855e-05	3e-05	7.81025e-05	1.31847e+06	119703	0.146267	0.020394
	[AA-BD]4-[TA-BD]	Cyclic		C52H76O20	[M+NH4]+	C52H80O20N	1038.53	8.1431e-05	-0.00038	8.18535e-05	787550	30846.3	0.0879309	0.0157087
	[AA-BD]4-[TA-BD]2	Cyclic		C64H88O24	[M+NH4]+	C64H92O24N	1258.6	9.96042e-05	-0.000156667	9.81495e-05	361748	26158.5	0.0402915	0.00686594
	[AA-BD]4-[TA-BD]3	Cyclic		C76H100O28	[M+NH4]+	C76H104O28N	1478.67	0.00013946	0.0006	0.000137477	97450.9	8738.81	0.0107878	0.00119011
9a	[AA-BD]4	Cyclic	13C	C3913CH64O16	[M+NH4]+	C3913CH68O16N	819.457	2.81726e-05	4.66667e-05	3.05505e-05	545099	33038.9	0.0608501	0.0112666
	[AA-BD]4-[TA-BD]	Cyclic	13C	C5113CH76O20	[M+NH4]+	C5113CH80O20N	1039.53	4.70354e-05	-0.00038	4.58258e-05	462965	45263.9	0.0516286	0.0100992
	[AA-BD]4-[TA-BD]2	Cyclic	13C	C6313CH88O24	[M+NH4]+	C6313CH92O24N	1259.6	6.43739e-05	-3.33333e-05	6.50641e-05	274500	25320.8	0.030512	0.00494534
	[AA-BD]4-[TA-BD]3	Cyclic	13C	C7513CH100O28	[M+NH4]+	C7513CH104O28N	1479.68	0.00026126	0.000633333	0.000260832	72154.2	15410.7	0.00819933	0.00303971
9b	[AA-BD]4	Cyclic	18O	C40H64O1518O	[M+NH4]+	C40H68O1518ON	820.46	3.57757e-05	0.00203333	4.04145e-05	129539	5879.65	0.0145115	0.00299012
			13C2	C3813C2H64O16		C3813C2H68O16N	820.46	3.57757e-05	-0.000433333	3.51188e-05	129539	5879.65	0.0145115	0.00299012
	[AA-BD]4-[TA-BD]	Cyclic	18O	C52H76O1918O	[M+NH4]+	C52H80O1918ON	1040.53	5.45619e-05	0.00160667	5.7735e-05	154071	19615.7	0.0169731	0.00122206
			13C2	C5013C2H76O20		C5013C2H80O20N	1040.53	5.45619e-05	-0.00086	5.19615e-05	154071	19615.7	0.0169731	0.00122206
	[AA-BD]4-[TA-BD]2	Cyclic	18O	C64H88O2318O	[M+NH4]+	C64H92O2318ON	1260.61	5.56507e-05	0.00159	5.56776e-05	114192	4260.65	0.0128107	0.00269668
			13C2	C6213C2H88O24		C6213C2H92O24N	1260.61	5.56507e-05	-0.000876667	5.68624e-05	114192	4260.65	0.0128107	0.00269668
	[AA-BD]4-[TA-BD]3	Cyclic	18O	C76H100O2718O	[M+NH4]+	C76H104O2718ON	1480.68	0.00107614	0.00212667	0.00107909	22797.1	5059.08	0.00259029	0.000975547
			13C2	C7413C2H100O28		C7413C2H104O28N	1480.68	0.00107614	-0.000336667	0.00107472	22797.1	5059.08	0.00259029	0.000975547
10	[AA-BD]4	Cyclic		C40H64O16	[M+Na]+	C40H64O16Na	823.409	1.99806e-05	0.00012	1.73205e-05	1.42259e+06	167975	0.156855	0.0118231
	[AA-BD]4-[TA-BD]	Cyclic		C52H76O20	[M+Na]+	C52H76O20Na	1043.48	8.33607e-05	-0.000316667	8.32666e-05	682662	82660.4	0.0752537	0.00567443
	[AA-BD]4-[TA-BD]2	Cyclic		C64H88O24	[M+Na]+	C64H88O24Na	1263.56	0.000117721	-6.66667e-06	0.000120139	325872	30116.4	0.0360366	0.00349096
	[AA-BD]4-[TA-BD]3	Cyclic		C76H100O28	[M+Na]+	C76H100O28Na	1483.63	9.79864e-05	0.000546667	9.86577e-05	88094.3	4481.04	0.00979806	0.00142362
10a	[AA-BD]4	Cyclic	13C	C3913CH64O16	[M+Na]+	C3913CH64O16Na	824.412	6.80172e-06	0.000126667	5.7735e-06	579983	70442.8	0.0639194	0.00454385
	[AA-BD]4-[TA-BD]	Cyclic	13C	C5113CH76O20	[M+Na]+	C5113CH76O20Na	1044.49	6.26605e-05	-0.0002	6.08276e-05	381361	55862.8	0.0419412	0.00295262
	[AA-BD]4-[TA-BD]2	Cyclic	13C	C6313CH88O24	[M+Na]+	C6313CH88O24Na	1264.56	0.00014095	0.000213333	0.000140475	229641	38457.5	0.0252189	0.00205866
	[AA-BD]4-[TA-BD]3	Cyclic	13C	C7513CH100O28	[M+Na]+	C7513CH100O28Na	1484.63	0.000183873	0.00102667	0.000185562	73856	4249.03	0.00822411	0.00125822
11	[SeA-BD]	Cyclic		C14H24O4	[M+Na]+	C14H24O4Na	279.157	2.32949e-05	-2e-05	4e-05	905332	118874	0.0996018	0.00487768	0.000157744	0.000273221	0.158375
	[SeA-BD]-[TA-BD]	Cyclic		C26H36O8	[M+Na]+	C26H36O8Na	499.23	1.86186e-05	-7.33333e-05	2.08167e-05	1.35212e+06	226821	0.148328	0.00884136
	[SeA-BD]-[TA-BD]2	Cyclic		C38H48O12	[M+Na]+	C38H48O12Na	719.304	2.47173e-05	-7.33333e-05	2.51661e-05	664910	110963	0.0729385	0.00413486
	[SeA-BD]-[TA-BD]3	Cyclic		C50H60O16	[M+Na]+	C50H60O16Na	939.377	1.2079e-05	-0.000146667	1.52753e-05	106618	4177.95	0.0119539	0.0024987
11a	[SeA-BD]	Cyclic		C1313CH24O4	[M+Na]+	C1313CH24O4Na	280.16	5.78187e-06	-4.33333e-05	5.7735e-06	106523	15231.6	0.0117038	0.000455467	1.09145e-05	1.89045e-05	0.0932565
	[SeA-BD]-[TA-BD]	Cyclic		C2513CH36O8	[M+Na]+	C2513CH36O8Na	500.234	4.42792e-05	-8.33333e-05	4.16333e-05	344886	49017.9	0.0379785	0.00333579
	[SeA-BD]-[TA-BD]2	Cyclic		C3713CH48O12	[M+Na]+	C3713CH48O12Na	720.307	5.92288e-05	-5e-05	6e-05	254836	44836	0.0279776	0.00257398
	[SeA-BD]-[TA-BD]3	Cyclic		C4913CH60O16	[M+Na]+	C4913CH60O16Na	940.38	0.000241159	-0.000216667	0.000275923	53400.5	9773.53	0.00588178	0.000867397
12	[SeA-BD]3	Cyclic		C42H72O12	[M+Na]+	C42H72O12Na	791.491	4.14699e-05	-0.000193333	4.16333e-05	588739	75939.6	0.0648036	0.00365731
	[SeA-BD]3-[TA-BD]	Cyclic		C54H84O16	[M+Na]+	C54H84O16Na	1011.56	1.7368e-05	-0.000256667	1.52753e-05	236660	33314.6	0.0261271	0.00326538
	[SeA-BD]3-[TA-BD]2	Cyclic		C66H96O20	[M+Na]+	C66H96O20Na	1231.64	4.12813e-05	-4.33333e-05	4.04145e-05	109010	18988.3	0.0119735	0.00115812
	[SeA-BD]3-[TA-BD]3	Cyclic		C78H108O24	[M+Na]+	C78H108O24Na	1451.71	0.000412147	0.00099	0.000410731	15035.8	4757.57	0.00165113	0.000463504
13	[SeA-BD]	Cyclic		C14H24O4	[M+NH4]+	C14H28O4N	274.201	7.5162e-06	-6.33333e-05	1.1547e-05	1052900	71362.8	0.117013	0.0169738	0.000112566	9.80841e-05	0.0961993
	[SeA-BD]-[TA-BD]	Cyclic		C26H36O8	[M+NH4]+	C26H40O8N	494.275	1.445e-05	-5e-05	1e-05	2901956	318738	0.321376	0.0429867	8.384e-06	1.45215e-05	0.00260878
	[SeA-BD]-[TA-BD]2	Cyclic		C38H48O12	[M+NH4]+	C38H52O12N	714.348	3.0254e-05	-0.00012	3e-05	837898	71679.8	0.0930041	0.0132121
	[SeA-BD]-[TA-BD]3	Cyclic		C50H60O16	[M+NH4]+	C50H64O16N	934.422	9.16076e-05	-0.000336667	9.2376e-05	134859	13487.2	0.01511	0.00350274
14a	[SeA-BD]	Cyclic	13C	C1313CH24O4	[M+NH4]+	C1313CH28O4N	275.205	1.51355e-05	-2.33333e-05	1.52753e-05	133000	4748.57	0.0148334	0.00239965	4.18109e-06		0.028187
	[SeA-BD]-[TA-BD]	Cyclic	13C	C2513CH36O8	[M+NH4]+	C2513CH40O8N	495.278	1.13583e-05	-9e-05	1e-05	778395	105670	0.0859119	0.00992031	1.42573e-05	2.46943e-05	0.0165952
	[SeA-BD]-[TA-BD]2	Cyclic	13C	C3713CH48O12	[M+NH4]+	C3713CH52O12N	715.352	1.62026e-05	-0.000153333	1.52753e-05	331624	28962.4	0.0368789	0.00603757
	[SeA-BD]-[TA-BD]3	Cyclic	13C	C4913CH60O16	[M+NH4]+	C4913CH64O16N	935.425	9.14818e-05	-0.000106667	9.45163e-05	71356.9	10230.5	0.00784679	0.000485208
15	[AA-BD]5	Cyclic		C50H80O20	[M+Na]+	C50H80O20Na	1023.51	0.000136566	-0.000313333	0.000136504	226479	20712.6	0.0250706	0.00279697
	[AA-BD]5-[TA-BD]	Cyclic		C62H92O24	[M+Na]+	C62H92O24Na	1243.59	0.000181017	0.000106667	0.000177858	203273	35386.7	0.0223525	0.0025476
	[AA-BD]5-[TA-BD]2	Cyclic		C74H104O28	[M+Na]+	C74H104O28Na	1463.66	0.000228974	0.000773333	0.00022942	87014.1	15917.1	0.00954363	0.000840437
	[AA-BD]5-[TA-BD]3	Cyclic		C86H116O32	[M+Na]+	C86H116O32Na	1683.73	0.000567548	0.00063	0.000571927	17803.3	4420.48	0.00193133	0.00015391
16	BD-[AA-BD]2	Linear		C24H42O10	[M+Na]+	C24H42O10Na	513.267	9.95515e-05	-0.00012	0.000103923	124393	16577.4	0.0137099	0.00123267	6.6296e-05	0.000101916	0.483562
	BD-[AA-BD]2-[TA-BD]	Linear		C36H54O14	[M+Na]+	C36H54O14Na	733.341	2.8198e-05	-6.66667e-05	3.05505e-05	537920	111105	0.0602261	0.0161795	0.0123593	0.0214069	20.5215
	BD-[AA-BD]2-[TA-BD]2	Linear		C48H66O18	[M+Na]+	C48H66O18Na	953.414	8.78958e-05	-0.00035	8.88819e-05	102815	7876.27	0.0114125	0.00149505
	BD-[AA-BD]2-[TA-BD]3	Linear		C60H78O22	[M+Na]+	C60H78O22Na	1173.49	0.0002915	-0.000173333	0.000292973	24469	4965.28	0.00272114	0.000689456
17	BD-[AA-BD]3	Linear		C34H58O14	[M+NH4]+	C34H62O14N	708.416	7.61954e-05	-0.00015	7.54983e-05	94567.7	628.158	0.0105716	0.00191038	8.23636e-06	1.42658e-05	0.0779104
	BD-[AA-BD]3-[TA-BD]	Linear		C46H70O18	[M+NH4]+	C46H74O18N	928.49	0.000129528	-0.000383333	0.000132791	131923	12358.7	0.0145797	0.00128611
	BD-[AA-BD]3-[TA-BD]2	Linear		C58H82O22	[M+NH4]+	C58H86O22N	1148.56	0.000196994	-0.00044	0.000199249	167812	30175.4	0.0189274	0.00534902	0.00212857	0.00368679	11.246
	BD-[AA-BD]3-[TA-BD]3	Linear		C70H94O26	[M+NH4]+	C70H98O26N	1368.64	0.000367902	-0.0007	0.00037	26328.9	15902.7	0.00304467	0.00225739
17a	BD-[AA-BD]3	Linear	13C	C3313CH58O14	[M+NH4]+	C3313CH62O14N	709.42	0.0001955	-0.000123333	0.000195021	17369.9	3888.07	0.00197295	0.000658837
	BD-[AA-BD]3-[TA-BD]	Linear	13C	C4513CH70O18	[M+NH4]+	C4513CH74O18N	929.493	0.000144016	-0.00046	0.000147309	63154.5	6579.9	0.00699892	0.000962392
	BD-[AA-BD]3-[TA-BD]2	Linear	13C	C5713CH82O22	[M+NH4]+	C5713CH86O22N	1149.57	0.000137706	-0.000426667	0.000138684	119540	21702.1	0.0132643	0.00275369	0.00135817	0.00235242	10.2393
	BD-[AA-BD]3-[TA-BD]3	Linear	13C	C6913CH94O26	[M+NH4]+	C6913CH98O26N	1369.64	0.000821429	-0.000113333	0.00082203	14490.7	1225.6	0.00160795	0.00021262
18	BD-[AA-BD]2	Linear		C24H42O10	[M+NH4]+	C24H46O10N	508.311	5.71048e-05	-0.00013	5.56776e-05	79904.7	637.418	0.00893	0.00160046	6.79306e-06	1.17659e-05	0.0760701
	BD-[AA-BD]2-[TA-BD]	Linear		C36H54O14	[M+NH4]+	C36H58O14N	728.385	6.97457e-05	-9.33333e-05	6.80686e-05	688732	75906.3	0.0773087	0.017552	0.00730979	0.0126609	9.45533
	BD-[AA-BD]2-[TA-BD]2	Linear		C48H66O18	[M+NH4]+	C48H70O18N	948.458	9.69629e-05	-0.000533333	9.29157e-05	187009	13869.4	0.0208872	0.00408801
	BD-[AA-BD]2-[TA-BD]3	Linear		C60H78O22	[M+NH4]+	C60H82O22N	1168.53	0.000281962	-0.000113333	0.000285365	30399.5	13237.6	0.00356719	0.00207256
19	[AA-BD]5	Cyclic		C50H80O20	[M+NH4]+	C50H84O20N	1018.56	0.000126653	-0.00049	0.000130767	232197	18014.8	0.0257896	0.00371812
	[AA-BD]5-[TA-BD]	Cyclic		C62H92O24	[M+NH4]+	C62H96O24N	1238.63	6.59394e-05	-9.66667e-05	6.65833e-05	211994	11680.9	0.0236631	0.00430934
	[AA-BD]5-[TA-BD]2	Cyclic		C74H104O28	[M+NH4]+	C74H108O28N	1458.71	0.000268437	0.00046	0.000269629	100599	16049.3	0.0112854	0.00311893
	[AA-BD]5-[TA-BD]3	Cyclic		C86H116O32	[M+NH4]+	C86H120O32N	1678.78	0.000574901	-9e-05	0.000574195	11048.4	825.819	0.00122371	0.000129124
U1							1024.52	9.84598e-05			117398	13317.4	0.0129438	0.000876503
							1244.59	6.07536e-05			128721	10548	0.0142451	0.00139807
							1464.66	9.31504e-05			70342.3	12136.3	0.00775036	0.0010708
							1684.74	0.000557199			15907.8	3352.8	0.00181883	0.000659189

## Sheet: 6. DI-Orbitrap-MS PBSe
Sequence	Structure	Type	Isotope	Molecular formula	Adduct	Elemental Composition	Average (n=3) ± 1SD								BLANK Average (n=3) ± 1SD
							Average m/z	±SD	Average δ / Da	±SD	Average Intensity	±SD	Average Normalised Intensity (IS)	±SD	Average Normalised Intensity (IS)	±SD	Normalised Contribution to Extract (IS) / %
1	[SeA-BD]	Cyclic		C14H24O4	[M+NH4]+	C14H28O4N	274.201	7.5162e-06	-6.33333e-05	1.1547e-05	1052900	71362.8	0.117013	0.0169738	0.000112566	9.80841e-05	0.0961993
	[SeA-BD]2	Cyclic		C28H48O8	[M+NH4]+	C28H52O8N	530.369	2.37337e-05	-0.000223333	0.00034356	3937758	292528	0.437428	0.0629622
	[SeA-BD]3	Cyclic		C42H72O12	[M+NH4]+	C42H76O12N	786.536	7.05002e-05	-0.000296667	7.02377e-05	845370	66065.3	0.0939785	0.0145208
	[SeA-BD]4	Cyclic		C56H96O16	[M+NH4]+	C56H100O16N	1042.7	0.00010641	-0.00036	0.00010583	123951	14708	0.0139042	0.00347394
1a	[SeA-BD]	Cyclic	13C	C1313CH24O4	[M+NH4]+	C1313CH28O4N	275.205	1.51355e-05	-2.33333e-05	1.52753e-05	133000	4748.57	0.0148334	0.00239965	2.09054e-06	2.95648e-06	0.0140935
	[SeA-BD]2	Cyclic	13C	C2713CH48O8	[M+NH4]+	C2713CH52O8N	531.372	1.18874e-05	-5.33333e-05	1.52753e-05	1.13308e+06	112731	0.12563	0.0175148
	[SeA-BD]3	Cyclic	13C	C4113CH72O12	[M+NH4]+	C4113CH76O12N	787.539	0.000102364	-0.00023	0.000103923	387681	34036.4	0.0431304	0.00724856
	[SeA-BD]4	Cyclic	13C	C5513CH96O16	[M+NH4]+	C5513CH100O16N	1043.71	0.000266118	-0.000386667	0.000265769	68211.9	4018.61	0.00765326	0.00169164
2	[TA-BD]-[SeA-BD]	Cyclic		C26H36O8	[M+NH4]+	C26H40O8N	494.275	1.445e-05	-5e-05	1e-05	2901956	318738	0.321376	0.0429867	8.384e-06	1.45215e-05	0.00260878
	[TA-BD]-[SeA-BD]2	Cyclic		C40H60O12	[M+NH4]+	C40H64O12N	750.442	4.73178e-05	-0.000346667	4.72582e-05	1.77044e+06	194998	0.196036	0.0258867	2.85947e-06	4.95276e-06	0.00145865
	[TA-BD]-[SeA-BD]3	Cyclic		C54H84O16	[M+NH4]+	C54H88O16N	1006.61	5.06392e-05	-0.000443333	5.50757e-05	394321	43360.3	0.0441218	0.0100778
	[TA-BD]-[SeA-BD]4	Cyclic		C68H108O20	[M+NH4]+	C68H112O20N	1262.78	9.62705e-05	-8.66667e-05	9.60902e-05	106012	8141.34	0.0117364	0.00117346
2a	[TA-BD]-[SeA-BD]	Cyclic	13C	C2513CH36O8	[M+NH4]+	C2513CH40O8N	495.278	1.13583e-05	-9e-05	1e-05	778395	105670	0.0859119	0.00992031	1.42573e-05	2.46943e-05	0.0165952
	[TA-BD]-[SeA-BD]2	Cyclic	13C	C3913CH60O12	[M+NH4]+	C3913CH64O12N	751.445	3.33231e-05	-0.000276667	3.78594e-05	751524	81577.2	0.0832029	0.0107251	0.000103557	0.000131811	0.124463
	[TA-BD]-[SeA-BD]3	Cyclic	13C	C5313CH84O16	[M+NH4]+	C5313CH88O16N	1007.61	9.55528e-05	-0.000396667	9.60902e-05	220942	20007.1	0.024889	0.00639564
	[TA-BD]-[SeA-BD]4	Cyclic	13C	C6713CH108O20	[M+NH4]+	C6713CH112O20N	1263.78	0.00013421	-0.00019	0.000135277	73671	10907.2	0.00824353	0.00208464	1.04218e-05	1.80511e-05	0.126424
3	[TA-BD]-[SeA-BD]	Cyclic		C26H36O8	[M+Na]+	C26H36O8Na	499.23	1.86186e-05	-7.33333e-05	2.08167e-05	1.35212e+06	226821	0.148328	0.00884136
	[TA-BD]-[SeA-BD]2	Cyclic		C40H60O12	[M+Na]+	C40H60O12Na	755.397	1.91408e-05	-0.00029	1.73205e-05	1.11287e+06	195613	0.122128	0.0103167
	[TA-BD]-[SeA-BD]3	Cyclic		C54H84O16	[M+Na]+	C54H84O16Na	1011.56	1.73877e-05	-0.000256667	1.52753e-05	236775	33170.4	0.02614	0.00324978
	[TA-BD]-[SeA-BD]4	Cyclic		C68H108O20	[M+Na]+	C68H108O20Na	1267.73	0.000108347	-0.000103333	0.000106927	55591.5	1878.97	0.00618558	0.000879784
3a	[TA-BD]-[SeA-BD]	Cyclic	13C	C2513CH36O8	[M+Na]+	C2513CH36O8Na	500.234	4.42792e-05	-8.33333e-05	4.16333e-05	344886	49017.9	0.0379785	0.00333579
	[TA-BD]-[SeA-BD]2	Cyclic	13C	C3913CH60O12	[M+Na]+	C3913CH60O12Na	756.401	5.65128e-05	-0.0003	5.2915e-05	461941	63215.9	0.0508305	0.00324418
	[TA-BD]-[SeA-BD]3	Cyclic	13C	C5313CH84O16	[M+Na]+	C5313CH84O16Na	1012.57	0.000115581	-0.000176667	0.000115036	138494	20795.3	0.0152344	0.00123718
	[TA-BD]-[SeA-BD]4	Cyclic	13C	C6713CH108O20	[M+Na]+	C6713CH108O20Na	1268.74	5.97523e-05	0.000416667	6.02771e-05	35666.6	2602.62	0.00396369	0.000585965
4	[SeA-BD]	Cyclic		C14H24O4	[M+Na]+	C14H24O4Na	279.157	2.32949e-05	-3.33333e-06	2.08167e-05	905332	118874	0.0996018	0.00487768	0.000157744	0.000273221	0.158375
	[SeA-BD]2	Cyclic		C28H48O8	[M+Na]+	C28H48O8Na	535.324	8.46109e-06	-7e-05	1e-05	2.8456e+06	402366	0.312811	0.0153769
	[SeA-BD]3	Cyclic		C42H72O12	[M+Na]+	C42H72O12Na	791.491	4.1479e-05	-0.000193333	4.16333e-05	588862	75883.8	0.0648174	0.003651
	[SeA-BD]4	Cyclic		C56H96O16	[M+Na]+	C56H96O16Na	1047.66	0.000115418	-3.33333e-05	0.000115902	81068.5	11763.8	0.00890308	0.000337174
4a	[SeA-BD]	Cyclic	13C	C1313CH24O4	[M+Na]+	C1313CH24O4Na	280.16	5.78187e-06	-4.33333e-05	5.7735e-06	106523	15231.6	0.0117038	0.000455467	1.92754e-05	1.71269e-05	0.164694
	[SeA-BD]2	Cyclic	13C	C2713CH48O8	[M+Na]+	C2713CH48O8Na	536.327	2.45929e-05	-4e-05	2.64575e-05	813894	117682	0.0894613	0.00482145
	[SeA-BD]3	Cyclic	13C	C4113CH72O12	[M+Na]+	C4113CH72O12Na	792.495	7.35822e-06	-0.00014	1e-05	273427	24860.7	0.0302348	0.00284726	0.000113354	0.000196335	0.374913
	[SeA-BD]4	Cyclic	13C	C5513CH96O16	[M+Na]+	C5513CH96O16Na	1048.66	0.000311198	-6.66667e-05	0.000308923	37035.1	5328.82	0.00407044	0.000262976	4.21312e-05	7.29734e-05	1.03505
5	[TA-BD]2	Cyclic		C24H24O8	[M+Na]+	C24H24O8Na	463.136	1.7512e-05	-0.000103333	1.52753e-05	694496	115118	0.076211	0.00475182	1.35609e-05	6.82154e-06	0.0177939
	[TA-BD]2-[SeA-BD]	Cyclic		C38H48O12	[M+Na]+	C38H48O12Na	719.304	2.47173e-05	-7.33333e-05	2.51661e-05	664910	110963	0.0729385	0.00413486
	[TA-BD]2-[SeA-BD]2	Cyclic		C52H72O16	[M+Na]+	C52H72O16Na	975.471	4.83847e-05	-0.000333333	5.03322e-05	245460	22448.9	0.0271475	0.00265887
	[TA-BD]2-[SeA-BD]3	Cyclic		C66H96O20	[M+Na]+	C66H96O20Na	1231.64	4.12593e-05	-4.33333e-05	4.04145e-05	109004	18994.8	0.0119728	0.00115919
5a	[TA-BD]2	Cyclic	13C	C2313CH24O8	[M+Na]+	C2313CH24O8Na	464.14	3.37334e-05	-0.000156667	3.51188e-05	163629	25788.7	0.0180087	0.00184263
	[TA-BD]2-[SeA-BD]	Cyclic	13C	C3713CH48O12	[M+Na]+	C3713CH48O12Na	720.307	5.92288e-05	-5e-05	6e-05	254836	44836	0.0279776	0.00257398
	[TA-BD]2-[SeA-BD]2	Cyclic	13C	C5113CH72O16	[M+Na]+	C5113CH72O16Na	976.474	1.21445e-05	-0.000273333	1.52753e-05	141958	12931.8	0.0157384	0.00207585
	[TA-BD]2-[SeA-BD]3	Cyclic	13C	C6513CH96O20	[M+Na]+	C6513CH96O20Na	1232.64	0.000100802	0.000213333	0.000100664	82721.2	16949.7	0.00907744	0.00120176
6	[TA-BD]2	Cyclic		C24H24O8	[M+NH4]+	C24H28O8N	458.181	1.93657e-05	-5e-05	2e-05	761913	94384	0.0841381	0.0091949	6.62265e-06	5.77087e-06	0.00787117
	[TA-BD]2-[SeA-BD]	Cyclic		C38H48O12	[M+NH4]+	C38H52O12N	714.348	3.0254e-05	-0.00012	3e-05	837898	71679.8	0.0930041	0.0132121
	[TA-BD]2-[SeA-BD]2	Cyclic		C52H72O16	[M+NH4]+	C52H76O16N	970.515	4.635e-05	-0.0005	4.3589e-05	380134	28325.4	0.0423358	0.00722929
	[TA-BD]2-[SeA-BD]3	Cyclic		C66H96O20	[M+NH4]+	C66H100O20N	1226.68	0.000212623	0	0.00021166	147325	15004	0.0164488	0.00341527
	[TA-BD]2-[SeA-BD]4	Cyclic		C80H120O24	[M+NH4]+	C80H124O24N	1482.85	0.000840508	0.000293333	0.000845005	18941.7	6872.44	0.00213652	0.000990684
6a	[TA-BD]2	Cyclic	13C	C2313CH24O8	[M+NH4]+	C2313CH28O8N	459.184	1.44253e-05	-0.000113333	1.52753e-05	175892	23704.2	0.0194871	0.00313555
	[TA-BD]2-[SeA-BD]	Cyclic	13C	C3713CH48O12	[M+NH4]+	C3713CH52O12N	715.352	1.62026e-05	-0.000153333	1.52753e-05	331624	28962.4	0.0368789	0.00603757
	[TA-BD]2-[SeA-BD]2	Cyclic	13C	C5113CH72O16	[M+NH4]+	C5113CH76O16N	971.519	0.000123344	-0.000476667	0.000126623	197911	25920.9	0.0221063	0.00506666
	[TA-BD]2-[SeA-BD]3	Cyclic	13C	C6513CH96O20	[M+NH4]+	C6513CH100O20N	1227.69	0.0002045	-0.000216667	0.000204287	109798	12558.1	0.0122551	0.00260826
7	[TA-BD]3	Cyclic		C36H36O12	[M+NH4]+	C36H40O12N	678.254	1.45351e-05	-0.000193333	1.1547e-05	449912	38561.2	0.0498394	0.00582185
	[TA-BD]3-[SeA-BD]	Cyclic		C50H60O16	[M+NH4]+	C50H64O16N	934.422	9.16076e-05	-0.000336667	9.2376e-05	134965	13313	0.0151219	0.00349466
	[TA-BD]3-[SeA-BD]2	Cyclic		C64H84O20	[M+NH4]+	C64H88O20N	1190.59	0.00021405	-0.000196667	0.000215019	93769.1	7703.37	0.0104954	0.00226248
	[TA-BD]3-[SeA-BD]3	Cyclic		C78H108O24	[M+NH4]+	C78H112O24N	1446.76	0.000626747	0.00102	0.00062482	15512.6	7028.62	0.00180127	0.00110327
8	[TA-BD]3	Cyclic		C36H36O12	[M+Na]+	C36H36O12Na	683.21	1.96543e-05	-0.000213333	2.08167e-05	243596	45047.2	0.026676	0.00165452
	[TA-BD]3-[SeA-BD]	Cyclic		C50H60O16	[M+Na]+	C50H60O16Na	939.377	1.2079e-05	-0.000146667	1.52753e-05	106582	4212.76	0.0119498	0.00249932
	[TA-BD]3-[SeA-BD]2	Cyclic		C64H84O20	[M+Na]+	C64H84O20Na	1195.54	0.000177399	-0.000266667	0.00017673	67012.2	7232.63	0.00740185	0.000697806
	[TA-BD]3-[SeA-BD]3	Cyclic		C78H108O24	[M+Na]+	C78H108O24Na	1451.71	0.000411875	0.00099	0.000410731	15035.8	4757.57	0.00165113	0.000463504

## Sheet: 7. DI-Orbitrap-MS PLA
Sequence	Structure	Type	Isotope	Molecular formula	Adduct	Elemental Composition	Average (n=3) ± 1SD								BLANK Average (n=3) ± 1SD
							Average m/z	±SD	Average δ / Da	±SD	Average Intensity	±SD	Average Normalised Intensity (IS)	±SD	Average Normalised Intensity (IS)	±SD	Normalised Contribution to Extract (IS) / %
1	[LA]2-Me	Linear		C7H12O5	[M+Na]+	C7H12O5Na	199.058	8.92132e-06	-0.000106667	1.1547e-05	181295	101963	0.0190029	0.00892937	0.000245074	0.000189305	1.28967
	[LA]3-Me	Linear		C10H16O7	[M+Na]+	C10H16O7Na	271.079	2.28108e-06	-5.66667e-05	5.7735e-06	426797	189242	0.0453855	0.0153871	7.14791e-06	1.23805e-05	0.0157493
	[LA]4-Me	Linear		C13H20O9	[M+Na]+	C13H20O9Na	343.1	2.05508e-06	-1.66667e-05	5.7735e-06	1.46703e+06	550886	0.157326	0.0426208
	[LA]5-Me	Linear		C16H24O11	[M+Na]+	C16H24O11Na	415.121	5.65184e-06	1.33333e-05	5.7735e-06	4.25383e+06	1.23216e+06	0.461338	0.0918579
	[LA]6-Me	Linear		C19H28O13	[M+Na]+	C19H28O13Na	487.142	7.79038e-06	-8.33333e-05	5.7735e-06	4.79572e+06	1.20892e+06	0.52177	0.0811955
	[LA]7-Me	Linear		C22H32O15	[M+Na]+	C22H32O15Na	559.163	1.21112e-05	-0.0001	1e-05	5.09393e+06	940084	0.558572	0.0642342
	[LA]8-Me	Linear		C25H36O17	[M+Na]+	C25H36O17Na	631.184	1.58606e-05	-9e-05	2e-05	4.69739e+06	561254	0.518837	0.0569016
	[LA]9-Me	Linear		C28H40O19	[M+Na]+	C28H40O19Na	703.206	2.96704e-06	-0.0001	0	3.56371e+06	212712	0.396016	0.0533181
	[LA]10-Me	Linear		C31H44O21	[M+Na]+	C31H44O21Na	775.227	6.69029e-06	-0.00018	1e-05	2.62532e+06	97932	0.294479	0.0612484
	[LA]11-Me	Linear		C34H48O23	[M+Na]+	C34H48O23Na	847.247	2.93469e-05	-0.000413333	2.88675e-05	1.82252e+06	177989	0.205819	0.0554368
	[LA]12-Me	Linear		C37H52O25	[M+Na]+	C37H52O25Na	919.269	4.61007e-05	-0.000276667	4.50925e-05	1.06045e+06	204357	0.121003	0.0437998
	[LA]13-Me	Linear		C40H56O27	[M+Na]+	C40H56O27Na	991.29	4.61693e-05	-0.000363333	4.72582e-05	669130	178001	0.0768824	0.0333332
	[LA]14-Me	Linear		C43H60O29	[M+Na]+	C43H60O29Na	1063.31	6.3498e-05	-0.000223333	6.4291e-05	510587	164140	0.0590593	0.0287273
	[LA]15-Me	Linear		C46H64O31	[M+Na]+	C46H64O31Na	1135.33	7.45855e-05	-0.000213333	7.57188e-05	404965	173455	0.047317	0.0279045
	[LA]16-Me	Linear		C49H68O33	[M+Na]+	C49H68O33Na	1207.35	3.26548e-05	-0.000273333	3.78594e-05	276404	127682	0.0323361	0.0201631
	[LA]17-Me	Linear		C52H72O35	[M+Na]+	C52H72O35Na	1279.37	6.53095e-05	5e-05	6.9282e-05	231764	135024	0.0274177	0.0202507
	[LA]18-Me	Linear		C55H76O37	[M+Na]+	C55H76O37Na	1351.4	0.000329099	0.00024	0.000331512	167702	87050.4	0.0196921	0.01337
	[LA]19-Me	Linear		C58H80O39	[M+Na]+	C58H80O39Na	1423.42	0.000367918	0.000783333	0.000371124	110709	91824.2	0.0134742	0.0128749
	[LA]20-Me	Linear		C61H84O41	[M+Na]+	C61H84O41Na	1495.44	0.0002753	0.000503333	0.000273008	63344.3	56017.3	0.00775631	0.00776811
1a	[LA]3-Me	Linear	13C	C913CH16O7	[M+Na]+	C913CH16O7Na	272.082	8.86085e-05	-0.000163333	9.07377e-05	213542	332945	0.0199868	0.0302404
	[LA]4-Me	Linear	13C	C1213CH20O9	[M+Na]+	C1213CH20O9Na	344.103	5.97523e-06	-3.66667e-05	5.7735e-06	376950	380326	0.0374395	0.032547
	[LA]5-Me	Linear	13C	C1513CH24O11	[M+Na]+	C1513CH24O11Na	416.125	1.39429e-05	9.33333e-05	1.1547e-05	796085	315407	0.0848953	0.0217001
	[LA]6-Me	Linear	13C	C1813CH28O13	[M+Na]+	C1813CH28O13Na	488.146	1.98258e-05	-5.66667e-05	2.3094e-05	995808	351911	0.106736	0.0222993
	[LA]7-Me	Linear	13C	C2113CH32O15	[M+Na]+	C2113CH32O15Na	560.167	5.90028e-06	-0.000106667	5.7735e-06	1.17664e+06	217350	0.128969	0.0140801
	[LA]8-Me	Linear	13C	C2413CH36O17	[M+Na]+	C2413CH36O17Na	632.188	3.53601e-06	0.00017	0.000207846	1.22823e+06	175277	0.137462	0.031064
	[LA]9-Me	Linear	13C	C2713CH40O19	[M+Na]+	C2713CH40O19Na	704.209	1.44503e-05	-0.00014	1e-05	965596	96632.1	0.108347	0.0239752
	[LA]10-Me	Linear	13C	C3013CH44O21	[M+Na]+	C3013CH44O21Na	776.23	2.64517e-05	-0.00021	2.64575e-05	664809	377106	0.078669	0.0507914
	[LA]11-Me	Linear	13C	C3313CH48O23	[M+Na]+	C3313CH48O23Na	848.251	9.68676e-05	-0.000456667	9.71253e-05	482532	380181	0.0584776	0.0482879
	[LA]12-Me	Linear	13C	C3613CH52O25	[M+Na]+	C3613CH52O25Na	920.272	0.000105136	-0.000223333	0.000107858	448328	93589.8	0.0512597	0.0193341
	[LA]13-Me	Linear	13C	C3913CH56O27	[M+Na]+	C3913CH56O27Na	992.293	7.67911e-05	-0.000276667	7.76745e-05	292161	65428.4	0.0333887	0.0130784
	[LA]14-Me	Linear	13C	C4213CH60O29	[M+Na]+	C4213CH60O29Na	1064.31	0.000116001	-0.000206667	0.000120968	251055	87098.2	0.0290671	0.0148907
	[LA]15-Me	Linear	13C	C4513CH64O31	[M+Na]+	C4513CH64O31Na	1136.34	0.000169302	-0.00018	0.00017088	204501	75857.8	0.0237473	0.0127097
	[LA]16-Me	Linear	13C	C4813CH68O33	[M+Na]+	C4813CH68O33Na	1208.36	0.000152399	-0.000156667	0.000153731	150184	100461	0.017966	0.0146424
	[LA]17-Me	Linear	13C	C5113CH72O35	[M+Na]+	C5113CH72O35Na	1280.38	0.000283	0.00011	0.000278747	124788	69425.7	0.0147995	0.0104388
	[LA]18-Me	Linear	13C	C5413CH76O37	[M+Na]+	C5413CH76O37Na	1352.4	0.0004608	0.00033	0.000480312	102512	67644.6	0.0122475	0.00988906
	[LA]19-Me	Linear	13C	C5713CH80O39	[M+Na]+	C5713CH80O39Na	1424.42	0.000192455	0.000356667	0.000192959	64257.7	62625	0.00781563	0.00865435
	[LA]20-Me	Linear	13C	C6013CH84O41	[M+Na]+	C6013CH84O41Na	1496.44	0.000419779	0.000463333	0.000415251	46724.6	47194.7	0.00579395	0.00642101
1b	[LA]5-Me	Linear	18O	C16H24O1018O	[M+Na]+	C16H24O1018ONa	417.125	0.000105243	-0.000196667	0.000107858	43677.6	14382.5	0.00472864	0.00121213
			13C2	C1413C2H24O11		C1413C2H24O11Na	417.125	0.000105243	-0.00187333	0.00140076	43677.6	14382.5	0.00472864	0.00121213
	[LA]6-Me	Linear	18O	C19H28O1218O	[M+Na]+	C19H28O1218ONa	489.147	0.000931816	0.00066	0.000926661	76387.7	21747.5	0.00837901	0.00219362
			13C2	C1713C2H28O13		C1713C2H28O13Na	489.147	0.000931816	-0.00180333	0.000929534	76387.7	21747.5	0.00837901	0.00219362
	[LA]7-Me	Linear	18O	C22H32O1418O	[M+Na]+	C22H32O1418ONa	561.168	0.000115213	0.00082	0.000117898	145811	26174.5	0.0160007	0.00184765
			13C2	C2013C2H32O15		C2013C2H32O15Na	561.168	0.000115213	-0.00164667	0.000113725	145811	26174.5	0.0160007	0.00184765
	[LA]8-Me	Linear	18O	C25H36O1618O	[M+Na]+	C25H36O1618ONa	633.19	4.51472e-05	0.00122	4.58258e-05	210503	28793.4	0.0232287	0.00276891
			13C2	C2313C2H36O17		C2313C2H36O17Na	633.19	4.51472e-05	-0.00124333	4.50925e-05	210503	28793.4	0.0232287	0.00276891
	[LA]9-Me	Linear	18O	C28H40O1718O	[M+Na]+	C28H40O1718ONa	705.211	9.59272e-05	0.00123333	9.60902e-05	218533	18618.1	0.024433	0.00471814
			13C2	C2613C2H40O19		C2613C2H40O19Na	705.211	9.59272e-05	-0.00122667	9.60902e-05	218533	18618.1	0.024433	0.00471814
	[LA]10-Me	Linear	18O	C31H44O2018O	[M+Na]+	C31H44O2018ONa	777.232	0.000175968	0.00132	0.000173494	204125	11869.4	0.0228896	0.00497423
			13C2	C2913C2H44O21		C2913C2H44O21Na	777.232	0.000175968	-0.00114667	0.000178979	204125	11869.4	0.0228896	0.00497423
	[LA]11-Me	Linear	18O	C34H48O2218O	[M+Na]+	C34H48O2218ONa	849.253	6.91724e-05	0.00101333	7.50555e-05	169205	20336.1	0.0191522	0.00557706
			13C2	C3213C2H48O23		C3213C2H48O23Na	849.253	6.91724e-05	-0.00145333	7.02377e-05	169205	20336.1	0.0191522	0.00557706
	[LA]12-Me	Linear	18O	C37H52O2418O	[M+Na]+	C37H52O2418ONa	921.274	1.35104e-05	0.00119333	1.1547e-05	131086	20575.8	0.0148979	0.00487451
			13C2	C3513C2H52O25		C3513C2H52O25Na	921.274	1.35104e-05	-0.00127333	1.52753e-05	131086	20575.8	0.0148979	0.00487451
	[LA]13-Me	Linear	18O	C40H56O2618O	[M+Na]+	C40H56O2618ONa	993.296	6.12654e-05	0.00119	6e-05	93211.7	23394.8	0.0107076	0.00447125
			13C2	C3813C2H56O27		C3813C2H56O27Na	993.296	6.12654e-05	-0.00127667	6.02771e-05	93211.7	23394.8	0.0107076	0.00447125
	[LA]14-Me	Linear	18O	C43H60O2818O	[M+Na]+	C43H60O2818ONa	1065.32	0.000271353	0.00149333	0.000270617	72215.3	32253.2	0.00844277	0.00513653
			13C2	C4113C2H60O29		C4113C2H60O29Na	1065.32	0.000271353	-0.00097	0.000269072	72215.3	32253.2	0.00844277	0.00513653
	[LA]15-Me	Linear	18O	C46H64O3018O	[M+Na]+	C46H64O3018ONa	1137.34	0.000103587	0.00156	0.000104403	62635.6	16281.3	0.00720757	0.00300662
			13C2	C4413C2H64O31		C4413C2H64O31Na	1137.34	0.000103587	-0.00067	0.000511175	62635.6	16281.3	0.00720757	0.00300662
	[LA]16-Me	Linear	18O	C49H68O3218O	[M+Na]+	C49H68O3218ONa	1209.36	0.000441328	0.00174667	0.000441852	45324.2	34948.5	0.00546567	0.00498133
			13C2	C4713C2H68O33		C4713C2H68O33Na	1209.36	0.000441328	-0.000716667	0.000436616	45324.2	34948.5	0.00546567	0.00498133
	[LA]17-Me	Linear	18O	C52H72O3418O	[M+Na]+	C52H72O3418ONa	1281.38	0.000124279	0.00188	0.0001249	44271.2	38047.5	0.00539683	0.00531863
			13C2	C5013C2H72O35		C5013C2H72O35Na	1281.38	0.000124279	-0.000583333	0.000123423	44271.2	38047.5	0.00539683	0.00531863
	[LA]18-Me	Linear	18O	C55H76O3618O	[M+Na]+	C55H76O3618ONa	1353.4	0.000477034	0.00152	0.000477912	30452.4	25619.1	0.00368309	0.00361026
			13C2	C5313C2H76O37		C5313C2H76O37Na	1353.4	0.000477034	-0.00094	0.000477912	30452.4	25619.1	0.00368309	0.00361026
2	[LA]3-Me	Linear		C10H16O7	[M+NH4]+	C10H20O7N	266.123	2.6257e-05	-3e-05	2.64575e-05	277980	117805	0.0298176	0.0106768	6.28458e-06	1.08852e-05	0.0210767
	[LA]4-Me	Linear		C13H20O9	[M+NH4]+	C13H24O9N	338.144	1.04933e-05	-6.33333e-05	1.1547e-05	1.03216e+06	336661	0.111323	0.0245666
	[LA]5-Me	Linear		C16H24O11	[M+NH4]+	C16H28O11N	410.166	2.168e-05	-9.66667e-05	2.08167e-05	2.42199e+06	535609	0.264343	0.0337433
	[LA]6-Me	Linear		C19H28O13	[M+NH4]+	C19H32O13N	482.187	1.56522e-05	-5.33333e-05	1.52753e-05	3.30334e+06	555748	0.362932	0.0403707
	[LA]7-Me	Linear		C22H32O15	[M+NH4]+	C22H36O15N	554.208	3.62387e-05	-9.33333e-05	3.21455e-05	3.2773e+06	342760	0.362873	0.0449477
	[LA]8-Me	Linear		C25H36O17	[M+NH4]+	C25H40O17N	626.229	3.1802e-05	-6.66667e-05	3.05505e-05	2861211	87658.8	0.3194	0.0539126
	[LA]9-Me	Linear		C28H40O19	[M+NH4]+	C28H44O19N	698.25	4.13232e-05	-0.000176667	4.04145e-05	2.22026e+06	172111	0.250129	0.0608025	0.00191831	0.00332261	0.766927
	[LA]10-Me	Linear		C31H44O21	[M+NH4]+	C31H48O21N	770.271	5.27109e-05	-0.000313333	5.1316e-05	1.68018e+06	229501	0.19052	0.0585386
	[LA]11-Me	Linear		C34H48O23	[M+NH4]+	C34H52O23N	842.292	5.17493e-05	-0.000423333	5.1316e-05	1.14792e+06	260350	0.131452	0.0519427	3.86992e-06	6.70289e-06	0.00294397
	[LA]12-Me	Linear		C37H52O25	[M+NH4]+	C37H56O25N	914.313	7.87533e-05	-0.00035	7.81025e-05	724104	206451	0.0833704	0.0376924
	[LA]13-Me	Linear		C40H56O27	[M+NH4]+	C40H60O27N	986.334	3.31326e-05	-0.000543333	3.51188e-05	445838	150043	0.051635	0.0258848
	[LA]14-Me	Linear		C43H60O29	[M+NH4]+	C43H64O29N	1058.36	6.51997e-05	-0.000343333	6.4291e-05	359220	168606	0.0421659	0.0264766
	[LA]15-Me	Linear		C46H64O31	[M+NH4]+	C46H68O31N	1130.38	0.000111014	-0.00035	0.00011	270272	140324	0.031762	0.0215599
	[LA]16-Me	Linear		C49H68O33	[M+NH4]+	C49H72O33N	1202.4	4.32666e-05	-0.000206667	4.16333e-05	185802	98224.2	0.0218586	0.015033
	[LA]17-Me	Linear		C52H72O35	[M+NH4]+	C52H76O35N	1274.42	0.000225734	-0.000103333	0.000228546	147808	105829	0.0177626	0.0152401
	[LA]18-Me	Linear		C55H76O37	[M+NH4]+	C55H80O37N	1346.44	2.38118e-05	-0.00032	2.64575e-05	104922	81105.1	0.0125741	0.0115699
2a	[LA]4-Me	Linear	13C	C1213CH20O9	[M+NH4]+	C1213CH24O9N	339.148	5.81062e-06	-3.66667e-05	5.7735e-06	128517	47438.2	0.0138929	0.00431882
	[LA]5-Me	Linear	13C	C1513CH24O11	[M+NH4]+	C1513CH28O11N	411.169	2.40056e-05	-3e-05	2.64575e-05	393637	110125	0.0428444	0.00903814
	[LA]6-Me	Linear	13C	C1813CH28O13	[M+NH4]+	C1813CH32O13N	483.19	2.25655e-05	-8e-05	2.64575e-05	608017	101110	0.0669449	0.00896154
	[LA]7-Me	Linear	13C	C2113CH32O15	[M+NH4]+	C2113CH36O15N	555.211	4.46026e-05	-0.000103333	4.50925e-05	745787	86633.8	0.0824182	0.00929274
	[LA]8-Me	Linear	13C	C2413CH36O17	[M+NH4]+	C2413CH40O17N	627.232	4.42484e-05	-7.66667e-05	4.6188e-05	757684	22180.3	0.0845555	0.0140527	1.73769e-05	3.00976e-05	0.0205508
	[LA]9-Me	Linear	13C	C2713CH40O19	[M+NH4]+	C2713CH44O19N	699.253	2.2229e-05	-0.000126667	2.08167e-05	637580	21463.9	0.0714536	0.0146116	0.000538945	0.000933481	0.754259
	[LA]10-Me	Linear	13C	C3013CH44O21	[M+NH4]+	C3013CH48O21N	771.274	6.03029e-05	-0.000253333	6.02771e-05	564320	91317.2	0.0642113	0.0212402
	[LA]11-Me	Linear	13C	C3313CH48O23	[M+NH4]+	C3313CH52O23N	843.295	9.21832e-05	-0.00038	9.16515e-05	437570	98919.8	0.0501225	0.0197454
	[LA]12-Me	Linear	13C	C3613CH52O25	[M+NH4]+	C3613CH56O25N	915.317	5.4987e-05	-0.000406667	5.50757e-05	288470	82611.6	0.0332366	0.0150549
	[LA]13-Me	Linear	13C	C3913CH56O27	[M+NH4]+	C3913CH60O27N	987.338	0.00010523	-0.00025	0.000103923	202162	85588.8	0.0235941	0.0138189
	[LA]14-Me	Linear	13C	C4213CH60O29	[M+NH4]+	C4213CH64O29N	1059.36	0.000151856	-0.000323333	0.000151767	177518	81749.6	0.0208272	0.0128881
	[LA]15-Me	Linear	13C	C4513CH64O31	[M+NH4]+	C4513CH68O31N	1131.38	0.000292426	-0.000143333	0.00029023	125674	68434	0.014868	0.0103741
	[LA]16-Me	Linear	13C	C4813CH68O33	[M+NH4]+	C4813CH72O33N	1203.4	0.000276182	-0.000523333	0.000277549	108786	65284.3	0.0129168	0.0097234
	[LA]17-Me	Linear	13C	C5113CH72O35	[M+NH4]+	C5113CH76O35N	1275.42	0.000304394	-0.000144667	0.000190382	82460.3	74571.7	0.0101116	0.0103193
	[LA]18-Me	Linear	13C	C5413CH76O37	[M+NH4]+	C5413CH80O37N	1347.44	0.000274143	-9.33333e-05	0.000276466	65304	61249.8	0.00800406	0.00847957
3	[LA]6	Cyclic		C18H24O12	[M+Na]+	C18H24O12Na	455.116	3.98402e-05	-5e-05	4.3589e-05	257887	57998.5	0.0295386	0.0111319
	[LA]7	Cyclic		C21H28O14	[M+Na]+	C21H28O14Na	527.137	1.938e-05	-7.33333e-05	2.08167e-05	286088	179287	0.0342635	0.0249403
	[LA]8	Cyclic		C24H32O16	[M+Na]+	C24H32O16Na	599.158	2.68159e-05	-0.000113333	2.88675e-05	130962	87840	0.0156714	0.0127942
	[LA]9	Cyclic		C27H36O18	[M+Na]+	C27H36O18Na	671.179	0.000169731	-8.66667e-05	0.000171561	52981.5	53835.7	0.0065091	0.00740118
	[LA]10	Cyclic		C30H40O20	[M+Na]+	C30H40O20Na	743.201	0.000541432	0.0003	0.000537401	37771	42097.9
	[LA]11	Cyclic		C33H44O22	[M+Na]+	C33H44O22Na	815.222	0.000496035	0.000305	0.000502046	45059.8	40813.9
	[LA]12	Cyclic		C36H48O24	[M+Na]+	C36H48O24Na	887.242	0.000364361	-0.000373333	0.000365559	51739.5	45211	0.00627122	0.00633833
4	[LA]6	Cyclic		C18H24O12	[M+NH4]+	C18H28O12N	450.16	2.85837e-05	-0.00013	2.64575e-05	184182	77744.8	0.0215724	0.012383
	[LA]7	Cyclic		C21H28O14	[M+NH4]+	C21H32O14N	522.182	4.14618e-05	-8e-05	4.3589e-05	153673	104302	0.0185156	0.0143953
	[LA]8	Cyclic		C24H32O16	[M+NH4]+	C24H36O16N	594.203	5.50051e-05	-0.000123333	5.50757e-05	109149	95315.7	0.0133315	0.0132797
	[LA]9	Cyclic		C27H36O18	[M+NH4]+	C27H40O18N	666.224	0.000138919	-0.00014	0.000135277	53974.1	64892	0.00677602	0.00872493
	[LA]10	Cyclic		C30H40O20	[M+NH4]+	C30H44O20N	738.245		-3e-05		75808.4	#DIV/0!
	[LA]11	Cyclic		C33H44O22	[M+NH4]+	C33H48O22N	810.266	0.000145735	-0.000115	0.000148492	53863.5	52274.3
5	PMS			C23H46O5	[M+Na]+	C23H46O5Na	425.323	5.20241e-05	-0.000643333	5.1316e-05	210901	34220.2	0.0231298	0.000860683
	PMS-[LA]			C26H50O7	[M+Na]+	C26H50O7Na	497.345	5.48235e-05	-9e-05	5.56776e-05	100705	9979.08	0.0112096	0.00201977	7.11706e-05	0.000106754	0.634907
	PMS-[LA]2			C29H54O9	[M+Na]+	C29H54O9Na	569.366	0.000117151	-0.000116667	0.000119304	55276.4	8799.69	0.00618479	0.00160911	1.8349e-05	3.17814e-05	0.296679
	PMS-[LA]3			C32H58O11	[M+Na]+	C32H58O11Na	641.387	0.000160337	0.000143333	0.000161658	26877.1	9932.34	0.00302075	0.00137635
	PMS-[LA]4			C35H62O13	[M+Na]+	C35H62O13Na	713.408	0.000388417	-0.000153333	0.000388115	12838.3	4959.59	0.00144158	0.000673157
	PMS-[LA]5			C38H66O15	[M+Na]+	C38H66O15Na	785.429	4.47259e-05	-0.000273333	4.6188e-05	4855704	461316	0.537221	0.0573858
	PMS-[LA]6			C41H70O17	[M+Na]+	C41H70O17Na	857.45	0.000324262	-0.000603333	0.000325167	10882.3	558.305	0.00120895	0.000159136
6	PMP			C21H42O5	[M+Na]+	C21H42O5Na	397.292	9.91178e-06	-1.33333e-05	1.1547e-05	265667	68930.3	0.0288151	0.00238302	3.39706e-05	6.05948e-06	0.117892
	PMP-[LA]			C24H46O7	[M+Na]+	C24H46O7Na	469.313	7.35501e-05	-0.000133333	7.50555e-05	93422.2	15828.1	0.0102836	0.00125277	2.30872e-05	2.22504e-05	0.224505
	PMP-[LA]2			C27H50O9	[M+Na]+	C27H50O9Na	541.335	0.000103888	-0.000143333	0.000100167	52723	11528.1	0.00574825	0.000339183
	PMP-[LA]3			C30H54O11	[M+Na]+	C30H54O11Na	613.356	0.000231398	-9.66667e-05	0.000228546	13237.8	4320.44	0.00153345	0.000715423	2.26169e-05	3.91736e-05	1.4749
	PMP-[LA]4			C33H58O13	[M+Na]+	C33H58O13Na	685.377	0.000126722	0.000166667	0.000126623	27275.8	12360.9	0.00319937	0.00181143
U1							451.192	3.95361e-05			105577	22938.4	0.0115501	0.00171197
							523.213	5.61912e-05			236028	52523	0.0257306	0.002901
							595.234	3.75955e-05			180610	27752.9	0.0198726	0.00211562
							667.255	9.15278e-05			152296	11049.5	0.0170306	0.00324106
							739.277	3.76793e-05			118635	17640.4	0.0134807	0.00425259
							811.298	0.00029329			77178.4	14344.9	0.00880578	0.00311401
U1a							524.216	0.000107765			46711.5	7698.62	0.00511919	0.000231912
							596.238	0.000105744			42508.4	8802.32	0.00472196	0.00111323
							668.259	0.000281329			36921.8	3338.19	0.00408105	0.000353874
							740.28	0.000161931			37685.7	3720.25	0.00424299	0.00102529
U2							325.198	2.39913e-05			12269.9	3230.7	0.0013728	0.000425099	0.000924945	0.000299692	67.3765
							397.22	4.56148e-05			23847.4	7954.97	0.00256082	0.000443469	5.60704e-05	6.93514e-05	2.18955
							469.241	4.73106e-05			26226	9469.9	0.00283713	0.000659232	9.17825e-05	0.000110574	3.23504
							541.262	0.000111926			69195.5	10942.3	0.0076054	0.000609565
							613.283	5.9432e-05			82493.5	7799.96	0.00921808	0.00177904
							685.304	0.000138475			85649.1	8271.6	0.00967455	0.00258346
							757.325	0.000111771			82620.2	30180.7	0.0095602	0.00506398
							829.346	6.65033e-05			55630.9	27100	0.00649173	0.00420327	2.68856e-06	4.65673e-06	0.0414152
							901.367	2.11947e-05			40050.2	25040.5	0.00475066	0.00370441
U3							464.285	6.80514e-05			37976.7	3834.74	0.00421122	0.000598612	2.24516e-05	2.29251e-05	0.533138
							536.306	8.03652e-05			90218.7	6634.8	0.0100834	0.00202392
							608.328	0.000105221			74230.1	16998.6	0.00844319	0.00325217
							680.347	1.37391e-05			264366	14791.6	0.0297209	0.00679641
							752.37	0.000210149			61353.6	20738	0.00710912	0.00357038
							824.391	0.000356138			39035.2	23530	0.00461324	0.00350281
U4							431.095	0.000114901			25145.9	6206.68	0.00272933	0.000267004
							503.116	0.000171025			33296.3	15390	0.00354224	0.00133976
							575.137	0.000101089			51654.8	10403.6	0.00570593	0.00114751
							647.158	0.000100612			48225.1	12060.7	0.00546812	0.00186923
							719.179	0.00012924			38049.9	3074.6	0.00425147	0.000795827
							791.201	0.000118813			34032.6	1414.58	0.00380971	0.000761142
							863.221	0.000116052			18206.3	6058.21	0.00203499	0.00074552
U5							562.171	0.000301031			19883.1	4221.54	0.00216626	0.000104995
							634.192	6.66158e-05			30711.5	15221.3	0.00333404	0.00162685
							706.214	0.000154315			27726.5	5544.3	0.00313071	0.000932664
							778.235	4.52843e-05			34183.6	3800.47	0.00385322	0.00104646
							850.255	0.000220311			30014.6	5813.68	0.00337022	0.000915654
							922.277	0.000161096			17687.9	3774.34	0.00201487	0.000759985
U6							587.195	4.06632e-05			57258.4	20502.4	0.00620528	0.00190107
							659.216	6.89557e-05			50691	20264.8	0.00541313	0.0015324
							731.237	0.000177074			55306.8	16135.6	0.00597962	0.00100918
							803.258	8.9947e-05			41217	8627.62	0.00449615	0.000380268
							875.279	0.00012236			17418.6	3614.12	0.00198959	0.000749006
U7							501.157	0.0002113			34368.1	14994.7	0.00364455	0.00101674
							573.179	7.40435e-05			43305.5	12386.1	0.00468218	0.000715705
							645.2	7.52158e-05			53487.4	5822.09	0.00589976	0.000422861
							717.221	0.000199329			41274.2	13205.1	0.0044418	0.000774967
							789.242	9.95806e-05			23483	7031.19	0.00254496	0.000538065
							861.263	0.000159744			20448.6	1824.3	0.0022605	0.000197867
U8							510.218	0.000107838			18014.9	8238.4	0.00190633	0.000539756
							582.239	0.000151489			31009.6	12005.6	0.00330901	0.000781379
							654.26	2.30942e-05			49472	18777.1	0.00528301	0.00109373
							726.28	0.000308018			63223.1	5033.57	0.0070719	0.00137443
							798.302	7.58924e-05			18812.7	9299.93	0.00211788	0.00110341
U9							673.304	7.60583e-05			239300	108546	0.0254822	0.00939143
							745.325	4.60774e-05			1.01131e+06	353318	0.108814	0.026844
							817.347	3.92869e-05			676426	198568	0.0732122	0.0136748
							889.367	5.48256e-05			244452	52668.9	0.026759	0.00404752

## Sheet: 8. HPLC-Orbitrap-MS QA
QA STD
Analyte	Type	RT range / min	Average TIC peak area ± 1SD	Average precursor ion ± 1SD / m/z	Charge / z	Elemental composition	Average δ ± 1SD / Da	Adduct	Molecular formula	Monoisotopic mass / Da	Average qualifier ion ± 1SD / m/z	Average qualifier ion ± 1SD / m/z	Average qualifier ion ± 1SD / m/z
[AA-BD]2	Cyclic	15.48 - 15.54	5.03 ± 0.03 E+09	418.24383 ± 0.00028	1	C20H36O8N	-0.00003 ± 0.00045	[M+NH4]+	C20H32O8	400.21	201.11224 ± 0.00012	111.04411 ± 0.00001	401.21709 ± 0.00000
[TA-BD]2	Cyclic	21.39 - 21.46	2.91 ± 0.11 E+09	458.18136 ± 0.00022	1	C24H28O8N	0.00042 ± 0.00022	[M+NH4]+	C24H24O8	440.147	387.10779 ± 0.00000	149.02344 ± 0.00007	369.09713 ± 0.00000
BBP (IS)		22.88 - 22.95	1.53 ± 0.11 E+09	313.14363 ± 0.00023	1	C19H21O4	0.00018 ± 0.00023	[M+H]+	C19H20O4	312.136	91.05428 ± 0.00007	149.02344 ± 0.00014	173.37755 ± 0.00009
ATBC		25.50 - 25.54	3.49 ± 0.38 E+09	403.23285 ± 0.00019	1	C20H35O8	0.00021 ± 0.00018	[M+H]+	C20H34O8	402.225	129.01834 ± 0.00008	185.08102 ± 0.00010	139.00274 ± 0.00007
[TA-BD]3	Cyclic	28.71 - 28.73	1.45 ± 0.09 E+09	678.25439 ± 0.00053	1	C36H40O12N	-0.00011 ± 0.00053	[M+NH4]+	C36H36O12	660.221	149.02340 ± 0.00007	387.10779 ± 0.00000	589.17083 ± 0.00000
PMS		31.47 - 31.49	4.87 ± 0.04 E+08	403.34217 ± 0.00021	1	C23H47O5	0.00037 ± 0.00021	[M+H]+	C23H46O5	402.335	385.33145 ± 0.00012	71.06421 ± 0.00005	101.05981 ± 0.00006

## Sheet: 9. HPLC-Orbitrap-MS
Mob. Phase	H2O, MeOH, 0.5 mM ammonium acetate
Assignment	Type	RT range / min	Average precursor ion / m/z	± 1SD	Charge / z	Intensity (average)	Elemental composition	δ / Da	Adduct	Molecular formula	Monoisotopic mass / Da	Qualifier ion / m/z	Qualifier ion / m/z	Qualifier ion / m/z
[LA]3-Me	Linear	3.19 - 3.20	266.123	1.47346e-05	1	7.76906e+07	C10H20O7N	-0.000246667	[M+NH4]+	C10H16O7	248.09	105.055	77.0597	89.0597
[LA]4-Me	Linear	4.22 - 4.54	338.145	0.000158574	1	1.21941e+08	C13H24O9N	0	[M+NH4]+	C13H20O9	320.111	105.055	89.0597	145.05
[LA]5-Me	Linear	6.02 - 7.05	410.166	0.000292243	1	1.48203e+08	C16H28O11N	-0.000223333	[M+NH4]+	C16H24O11	392.132	89.0597	105.055	145.05
[LA]6-Me	Linear	9.52 - 11.28	482.187	0.000337231	1	1.49242e+08	C19H32O13N	-0.00027	[M+NH4]+	C19H28O13	464.153	217.071	145.05	89.0597
[LA]7-Me	Linear	13.36 - 14.61	554.208	6.35274e-05	1	1.14628e+08	C22H36O15N	-0.00023	[M+NH4]+	C22H32O15	536.174	217.071	145.05	89.0597
[AA-BD]2	Cyclic	15.48 - 15.52	418.244	0.000196201	1	1.11664e+09	C20H36O8N	-0.000186667	[M+NH4]+	C20H32O8	400.21	201.112	111.044	401.217
[LA]8-Me	Linear	15.91 - 16.86	626.229	0.000283556	1	8.09155e+07	C25H40O17N	-0.000493333	[M+NH4]+	C25H36O17	608.195	217.071	145.05	89.0597
[SeA-BD]	Cyclic	17.99 - 18.02	274.201	8.40389e-05	1	1.70144e+08	C14H28O4N	1.33333e-05	[M+NH4]+	C14H24O4	256.167	185.117	257.175	203.128
[LA]9-Me	Linear	17.73 - 18.50	698.249	0.000256003	1	5.58463e+07	C28H44O19N	-0.00072	[M+NH4]+	C28H40O19	680.216	217.071	145.05	89.0598
[AA-BD]-[TA-BD]	Cyclic	19.28 - 19.34	438.212	8.80967e-06	1	6.71365e+08	C22H32O8N	-7.66667e-05	[M+NH4]+	C22H28O8	420.178	221.081	149.023	111.044
[LA]10-Me	Linear	19.11 - 19.79	770.27	0.000186465	1	3.80994e+07	C31H48O21N	-0.000733333	[M+NH4]+	C31H44O21	752.238	217.071	145.05	361.113
[AA-BD]3	Cyclic	21.30 - 21.34	618.348	0.000211432	1	8.02324e+08	C30H52O12N	-1e-05	[M+NH4]+	C30H48O12	600.315	201.112	111.044	401.217
[TA-BD]2	Cyclic	21.37 - 21.42	458.181	9.15527e-05	1	2.29516e+08	C24H28O8N	1.66667e-05	[M+NH4]+	C24H24O8	440.147	387.108	149.023	369.097
BBP (IS)		22.84 - 22.92	313.143	8.49573e-05	1	1.12689e+09	C19H21O4	-5.66667e-05	[M+H]+	C19H20O4	312.136	91.0542	149.023	173.378
[AA-BD]2-[TA-BD]	Cyclic	23.62 - 23.68	638.317	3.52387e-05	1	1.40092e+09	C32H48O12N	-0.000186667	[M+NH4]+	C32H44O12	620.283	221.081	421.186	149.023
[AA-BD]4	Cyclic	24.14 - 24.17	818.453	0.000444692	1	2.36731e+08	C40H68O16N	-0.000463333	[M+NH4]+	C40H64O16	800.419	201.112	401.217	801.426
[TA-BD]-[SeA-BD]	Cyclic	25.28 - 25.29	494.275	0.000152842	1	6.49819e+08	C26H40O8N	0.000136667	[M+NH4]+	C26H36O8	476.241	149.023	405.191	221.081
ATBC		25.45 - 25.51	403.233	0.000139849	1	3.84291e+09	C20H35O8	0.00024	[M+H]+	C20H34O8	402.225	129.018	185.081	139.003
[AA-BD]3-[TA-BD]	Cyclic	25.77 - 25.80	838.421	0.000288441	1	6.94018e+08	C42H64O16N	-0.000796667	[M+NH4]+	C42H60O16	820.388	221.081	421.166	821.395
[AA-BD]5	Cyclic	25.88 - 25.91	1018.56	0.000381164	1	3.39473e+07	C50H84O20N	-0.000686667	[M+NH4]+	C50H80O20	1000.52	201.112	401.217	1001.53
[AA-BD]-[TA-BD]2	Cyclic	26.05 - 26.11	658.286	0.000244141	1	9.11283e+08	C34H44O12N	0.00021	[M+NH4]+	C34H40O12	640.252	387.107	441.154	149.023
TBA		26.99 - 27.01	343.212	0.000127055	1	5.29175e+08	C18H31O6	0.00015	[M+H]+	C18H30O6	342.204	139.003	157.013	111.008
[AA-BD]4-[TA-BD]	Cyclic	27.13 - 27.15	1038.53	0.000497103	1	1.40497e+08	C52H80O20N	-0.000716667	[M+NH4]+	C52H76O20	1020.49	221.081	201.112	421.186
[AA-BD]2-[TA-BD]2	Cyclic	27.10 - 27.36	858.391	0.000161484	1	5.97196e+08	C44H60O16N	2.66667e-05	[M+NH4]+	C44H56O16	840.357	387.107	149.023	221.081
[SeA-BD]2	Cyclic	27.50 - 27.52	530.369	9.81003e-05	1	7.27282e+08	C28H52O8N	0.00021	[M+NH4]+	C28H48O8	512.335	185.117	257.175	513.342
[AA-BD]5-[TA-BD]	Cyclic	28.10 - 28.11	628.333	0.000110033	2	1.16423e+08	C31H50O12N	0.00032	[M+2NH4]2+	C62H92O24	1220.6	221.081	201.112	338.172
			1238.63	0.000508219	1	2.9593e+07	C62H96O24N	-4.66667e-05	[M+NH4]+	C62H92O24	1220.6	221.081	201.112	421.186
[AA-BD]3-[TA-BD]2	Cyclic	28.16 - 28.41	1058.5	0.000322968	1	2.70976e+08	C54H76O20N	-0.000403333	[M+NH4]+	C54H72O20	1040.46	221.081	387.108	149.023
[AA-BD]-[TA-BD]3	Cyclic	28.72 - 28.74	878.359	6.35274e-05	1	2.09956e+08	C46H56O16N	-0.00042	[M+NH4]+	C46H52O16	860.326	149.023	387.108	221.081
[TA-BD]3	Cyclic	28.72 - 28.74	678.254	8.80967e-05	1	1.96369e+08	C36H40O12N	-5.66667e-05	[M+NH4]+	C36H36O12	660.221	149.023	387.107	589.171
[AA-BD]6-[TA-BD]	Cyclic	28.84 - 28.85	728.385	3.52387e-05	2	5.85997e+07	C36H58O14N	-0.00027	[M+2NH4]2+	C72H108O28	1420.7	201.112	221.081	401.217
[AA-BD]4-[TA-BD]2	Cyclic	28.95 - 29.17	638.317	0.000176193	2	2.26647e+08	C32H48O12N	-3.33333e-06	[M+NH4]+	C64H88O24	1240.57	221.081	421.186	621.291
			1258.6	0.000161484	1	9.76973e+07	C64H92O24N	-3.33333e-05	[M+NH4]+	C64H88O24	1240.57	221.081	149.023	421.186
[TA-BD]2-[SeA-BD]	Cyclic	29.24 - 29.27	714.348	0.000107174	1	2.70748e+08	C38H52O12N	-0.000143333	[M+NH4]+	C38H48O12	696.315	387.108	149.024	697.322
[AA-BD]2-[TA-BD]3	Cyclic	29.26 - 29.56	1078.46	0.000140955	1	1.89886e+08	C56H72O20N	-0.0008	[M+NH4]+	C56H68O20	1060.43	149.023	221.081	387.107
[AA-BD]7-[TA-BD]	Cyclic	29.39 - 29.40	828.438	6.10352e-05	2	2.88791e+07	C41H66O16N	1e-05	[M+2NH4]2+	C82H124O32	1620.81	201.112	221.081	401.217
[AA-BD]5-[TA-BD]2	Cyclic	29.57 - 29.73	738.369	0.00017353	2	1.70699e+08	C37H56O14N	-0.00012	[M+2NH4]2+	C74H104O28	1440.67	221.081	201.112	387.108
PMP		29.68 - 29.69	375.311	0	1	4.25964e+07	C21H43O5	0.00023	[M+H]+	C21H42O5	374.303	357.3	71.0492	101.06
PMP-LA(-H2O)		29.69 - 29.73	429.321	9.15527e-05	1	1.15429e+07	C24H45O6	0.0001	[M+H]+	C24H44O6	428.314	429.321	83.0492	95.0855
[AA-BD]3-[TA-BD]3	Cyclic	29.72 - 30.14	648.302	0.000113276	2	1.66707e+08	C33H46O12N	1.66667e-05	[M+2NH4]2+	C66H84O24	1260.54	221.081	387.107	149.023
			1278.57	0.000315403	1	9.3644e+07	C66H88O24N	-0.000206667	[M+NH4]+	C66H84O24	1260.54	221.081	149.023	387.107
[TA-BD]-[SeA-BD]2	Cyclic	30.03 - 30.06	750.442	0.000214348	1	4.89038e+08	C40H64O12N	-0.000303333	[M+NH4]+	C40H60O12	732.408	149.024	733.416	203.128
[AA-BD]4-[TA-BD]3	Cyclic	30.26 - 30.62	748.353	0.000214348	2	2.0626e+08	C38H54O14N	-0.000586667	[M+2NH4]+	C76H100O28	1460.64	221.081	387.107	149.023
			1478.67	0.000392401	1	2.4912e+07	C76H104O28N	-0.000363333	[M+NH4]+	C76H100O28	1460.64	221.081	387.108	149.023
[AA-BD]5-[TA-BD]3	Cyclic	30.68 - 31.04	848.406	0.000113276	2	1.24512e+08	C43H62O16N	-0.00049	[M+2NH4]2+	C86H116O32	1660.74	221.081	387.107	421.186
[SeA-BD]3	Cyclic	30.88 - 30.93	786.536	0.000203196	1	2.17836e+08	C42H76O12N	-0.000383333	[M+NH4]+	C42H72O12	768.502	203.128	257.175	769.509
[TA-BD]3-[SeA-BD]	Cyclic	30.88 - 30.89	934.421	0.000168081	1	6.39602e+07	C50H64O16N	-0.00083	[M+NH4]+	C50H60O16	916.388	149.023	387.108	203.07
[TA-BD]3-[AA-BD]6	Cyclic	31.07 - 31.38	948.459	0.000137611	2	4.81127e+07	C48H70O18N	-0.00025	[M+2NH4]2+	C96H132O36	1860.85	221.081	387.108	201.112
PMS		31.43 - 31.50	403.342	0.000156604	1	3.36269e+07	C23H47O5	0.0002	[M+H]+	C23H46O5	402.335	385.331	71.0492	83.0492
PMS-LA(-H2O)		31.43 - 31.47	457.353	0.000153598	1	1.02471e+07	C26H49O6	0.00021	[M+H]+	C26H48O6	492.345	457.352	83.0491	95.0855
[TA-BD]2-[SeA-BD]2	Cyclic	31.64 - 31.66	970.516	0.000231075	1	1.08899e+08	C52H76O16N	-7e-05	[M+NH4]+	C52H72O16	952.482	149.023	387.108	953.489
[AA-BD]5-[TA-BD]4	Cyclic	31.67 - 32.16	958.443	0.000387625	2	2.11516e+07	C49H68O18N	-0.000313333	[M+2NH4]2+	C98H128O36	1880.82	221.081	387.107	421.186
[TA-BD]-[SeA-BD]3	Cyclic	32.40 - 32.43	1006.61	0.000359797	1	1.08227e+08	C54H88O16N	-0.000386667	[M+NH4]+	C54H84O16	988.576	149.023	203.128	257.175
BD-[TA-BD]2-[SeA-BD]4	Linear	32.73 - 32.77	795.476	1.39237e-13	2	1.08113e+07	C42H69O13N	-0.0002	[M+2NH4]2+	C84H130O26	1554.89	149.023	203.128	257.175
[TA-BD]3-[SeA-BD]2	Cyclic	33.16 - 33.18	1190.59	0.000427246	1	3.33839e+07	C64H88O20N	-0.00037	[M+NH4]+	C64H84O20	1172.56	149.023	387.107	1173.56
[SeA-BD]4	Cyclic	33.17 - 33.20	1042.7	0.000186465	1	2.64841e+07	C56H100O16N	-0.000243333	[M+NH4]+	C56H96O16	1024.67	257.175	203.128	185.117
[TA-BD]2-[SeA-BD]3	Cyclic	33.92 - 33.95	622.359	0.000123335	2	5.63118e+07	C33H52O10N	0.000246667	[M+NH4]+	C66H96O20	1208.65	149.023	203.128	387.107
			1226.68	0.000196201	1	4.72892e+07	C66H100O20N	0.00015	[M+NH4]+	C66H96O20	1208.65	149.023	203.128	387.108
[TA-BD]-[SeA-BD]4	Cyclic	34.78 - 34.81	640.406	4.66164e-05	2	5.66557e+07	C34H58O10N	0.00034	[M+NH4]+	C68H108O20	1244.74	257.175	203.128	149.023
			1262.78	0.000645935	1	2.14303e+07	C68H112O20N	-0.000283333	[M+NH4]+	C68H108O20	1244.74	149.023	257.175	203.128
[TA-BD]3-[SeA-BD]3	Cyclic	35.60 - 35.63	732.395	0.000214348	2	5.98143e+07	C39H58O12N	4.66667e-05	[M+NH4]+	C78H108O24	1428.72	149.023	387.107	203.128
			1446.76	0.000742525	1	8.17949e+06	C78H112O24N	-0.000136667	[M+NH4]+	C78H108O24	1428.72	149.023	387.107	203.07
[TA-BD]2-[SeA-BD]4	Cyclic	36.59 - 36.63	750.442	0.00039712	2	8.51959e+07	C40H64O12N	-0.000566667	[M+NH4]+	C80H120O24	1464.82	149.023	203.128	257.175
[TA-BD]-[SeA-BD]5	Cyclic	37.70 - 37.77	768.489	0.000229051	2	3.8171e+07	C41H70O12N	-0.000366667	[M+NH4]+	C82H132O24	1500.91	203.128	257.175	149.023
[TA-BD]3-[SeA-BD]4	Cyclic	38.81 - 38.92	860.479	0.000168078	2	3.04278e+07	C46H70O14N	-0.00022	[M+NH4]+	C92H132O28	1684.89	149.023	203.128	257.175
